1                                    **Intra-mitochondrial protein degradation**  
2                                    **alleviates alpha-synuclein seeding and Abeta 42 aggregation**

3  
4                                    **Running title: Intra-mitochondrial protein degradation**

5  
6                                    Janin Lautenschläger<sup>1\*</sup>, Sara Wagner-Valladolid<sup>1</sup>, Amberley D. Stephens<sup>1</sup>, Ana Fernández-  
7                                    Villegas<sup>1</sup>, Colin Hockings<sup>1</sup>, Ajay Mishra<sup>1</sup>, James D. Manton<sup>2</sup>, Marcus J. Fantham<sup>3</sup>, Meng Lu<sup>1</sup>,  
8                                    Eric J. Rees<sup>2</sup>, Clemens F. Kaminski<sup>3</sup>, Gabriele S. Kaminski Schierle<sup>1\*</sup>

9  
10                                    <sup>1</sup> Molecular Neuroscience Group, Department of Chemical Engineering and Biotechnology,  
11                                    University of Cambridge, West Cambridge Site, Philippa Fawcett Drive, Cambridge, CB3 0AS,  
12                                    UK; <sup>2</sup> Quantitative Imaging Group, Department of Chemical Engineering and Biotechnology,  
13                                    University of Cambridge, West Cambridge Site, Philippa Fawcett Drive, Cambridge, CB3 0AS,  
14                                    UK; <sup>3</sup> Laser Analytics Group, Department of Chemical Engineering and Biotechnology,  
15                                    University of Cambridge, West Cambridge Site, Philippa Fawcett Drive, Cambridge, CB3 0AS,  
16                                    UK

17  
18                                    \* Corresponding authors:

19                                    Janin Lautenschläger, Gabriele S. Kaminski Schierle

20                                    Email: [janin.lautenschlaeger@gmail.com](mailto:janin.lautenschlaeger@gmail.com), [gsk20@cam.ac.uk](mailto:gsk20@cam.ac.uk)

21                                    Molecular Neuroscience Group, Department of Chemical Engineering and Biotechnology

22                                    University of Cambridge, West Cambridge Site, Philippa Fawcett Drive, Cambridge, CB3 0AS, UK

23

24                                    Character count: 55 270

25

26 **Abstract**

27 Mitochondria have long been implicated in Parkinson's disease, ever since the discovery that  
28 inhibitors of the mitochondrial complex I can lead to dopaminergic neuron death. We report  
29 here that intra-mitochondrial protein degradation alleviates (PFF)-induced alpha-synuclein  
30 seeding, highly relevant for the spreading of alpha-synuclein pathology. We find that  
31 interference with mitochondrial protein import as well as intra-mitochondrial proteases  
32 aggravates the aggregation profile and indeed, alpha-synuclein shows themselves as intra-  
33 mitochondrial protein. We further demonstrate that mitochondrial protein degradation is  
34 relevant for the aggregation of Abeta 42, suggesting that mitochondria are directly linked to  
35 disturbances in cytosolic protein homeostasis of aggregation prone proteins. Taken together,  
36 this draws a new picture of how mitochondrial dysfunction is involved in neurodegenerative  
37 diseases and provokes new therapeutical approaches.

38

39

40

41

42

43

44

45

46

47

48 **Keywords:** alpha-synuclein / Abeta 42 / mitochondria / neurodegeneration / seeding

49

## 50 **Introduction**

51

52 Mitochondria have long been implicated in Parkinson's disease (PD), ever since the discovery  
53 that inhibitors of the mitochondrial complex I can lead to dopaminergic neuron death  
54 (Langston *et al*, 1983; Burns *et al*, 1983; Betarbet *et al*, 2000; Greenamyre *et al*, 2001; Sherer  
55 *et al*, 2003). Furthermore, mutation of phosphatase and tensin homolog (PTEN)-induced  
56 kinase 1 (PINK1) or parkin, leading to failure of mitophagy, link mitochondrial dysfunction and  
57 familial PD. A connection between both, alpha-synuclein aggregation and mitochondrial  
58 dysfunction, is suggested by recent studies highlighting that alpha-synuclein aggregation is  
59 increased in PINK1 and parkin mutant iPS-cells and parkin transgenic mice (Chung *et al*, 2016;  
60 Lu *et al*, 2009).

61

62 An important factor influencing PD pathophysiology is the fact that alpha-synuclein  
63 aggregates can spread from cell to cell, which has been described as prion-like behavior  
64 (Kordower & Brundin, 2009; Stopschinski & Diamond, 2017). Indeed, also in vitro small fibrillar  
65 seeds, constituting misfolded alpha-synuclein, transfer from one cell to another and induce  
66 aggregation of normally folded endogenous alpha-synuclein (Luk *et al*, 2009; Pinotsi *et al*,  
67 2016). Since the seeding of alpha-synuclein is understood as a driving force for disease  
68 progression, we here aimed to investigate if mitochondrial dysfunction and which  
69 mechanisms of mitochondrial dysfunction in particular influence the alpha-synuclein seeding  
70 propensity.

71

72 Using the preformed fibril (PFF)-induced alpha-synuclein aggregation model we show that  
73 mitochondrial dysfunction clearly aggravated PFF-induced seeding, however an artificial

74 increase in cytosolic calcium, oxidative stress or inhibition of complex I were not able to  
75 reproduce the enhanced seeding of alpha-synuclein. We demonstrate that the seeding  
76 propensity is dependent on intra-mitochondrial proteostasis, and identified that the high  
77 temperature requirement protein A2 (HtrA2), a mitochondrial intermembrane protease, and  
78 mitochondrial protein import are crucial in determining the level of alpha-synuclein seeding.  
79 We further show that alpha-synuclein is found in mitochondria, supporting our hypothesis  
80 that mitochondria play an important role in alpha-synuclein degradation.

81

82

## 83 **Results**

84

### 85 **The preformed fibril (PFF) model mimics alpha-synuclein seeding in disease**

86

87 The seeding of alpha-synuclein aggregation was modelled by the preformed fibril (PFF) assay  
88 as initially developed by Luk et al. (Luk *et al*, 2009), and proved to be of substantial use in  
89 studying alpha-synuclein aggregation in vitro as well as in vivo (Pinotsi *et al*, 2016; Luk *et al*,  
90 2009, 2012; Peelaerts *et al*, 2015; Thakur *et al*, 2017). Here, SH-SY5Y cells overexpressing YFP-  
91 alpha-synuclein were incubated for 4 hours with PFFs made from unlabeled human  
92 recombinant alpha-synuclein (Supplementary Fig. 1), and cultured for another 3 days to allow  
93 seeding of alpha-synuclein aggregation (Fig. 1A). While YFP-alpha-synuclein overexpressing  
94 cells per se not display any Lewy-body-like inclusions, fine filamentous inclusions build up from  
95 YFP-alpha-synuclein are seen by structured illumination microscopy (SIM) upon PFF  
96 incubation (Fig. 1B). This model system reflects a late disease state in which the seeds for  
97 aggregation are already present and thus has a particular focus on factors influencing alpha-

98 synuclein seeding. YFP-alpha-synuclein inclusions stain positive for ubiquitin and p62, which  
99 are both characteristic markers found in Lewy bodies of human disease (Luk *et al*, 2009) (Fig.  
100 1C and D).

101

102

### 103 **Mitochondrial dysfunction increases alpha-synuclein seeding**

104

105 From our previous study, we have seen that alpha-synuclein strongly interacts with calcium,  
106 leading to conformational changes at the calcium binding domain at the C-terminus, but also  
107 at the NAC-region, which suggests a potential influence of calcium on the aggregation  
108 propensity of alpha-synuclein. Consistently, increased calcium significantly aggravated alpha-  
109 synuclein nucleation in vitro (Lautenschläger *et al*, 2018). However surprisingly, when cells  
110 were treated with BAPTA-AM, a well-known specific calcium chelator, PFF-induced alpha-  
111 synuclein seeding was drastically increased (Fig. 2A). This is in contrast to what has been  
112 expected, since BAPTA-AM is supposed to decrease cytosolic calcium and was reported  
113 previously to alleviate KCl-induced alpha-synuclein aggregation (Follett *et al*, 2013). In our  
114 study, we found that BAPTA-AM did decrease cytosolic calcium in the SH-SY5Y cells, but only  
115 transiently. The effect was already compensated for treatments of 1 hour and 5 hours (Fig.  
116 2B), suggesting that the effect on alpha-synuclein seeding is mediated via a different pathway.  
117 Both the ester form BAPTA, BAPTA-AM, as well as the active BAPTA itself did not increase the  
118 aggregation of alpha-synuclein in vitro (t50 125.6+/-8.6 and 122.6+/-7.2 vs. 116.6+/-11.1) (Fig.  
119 2C), indicating that the effect of BAPTA in the PFF assay results from a cellular response. In  
120 fact, we found that BAPTA-AM had a direct impact on mitochondria, inducing organelle  
121 fragmentation as determined by SIM imaging (Fig. 2D). This cellular response upon BAPTA-AM

122 treatment is related to an increase of ER-dependent mitochondrial fission and has been  
123 reported previously (Friedman *et al*, 2011).

124

125 This led us to hypothesize that mitochondrial dysfunction per se could influence alpha-  
126 synuclein seeding. Indeed, also carbonyl cyanide 4-(trifluoromethoxy)phenylhydrazone  
127 (FCCP), a mitochondrial uncoupler that dissipates the mitochondrial membrane potential and  
128 thus leads to mitochondrial dysfunction, increased YFP-alpha-synuclein seeding (Fig. 2E).  
129 Similarly, FCCP did not increase alpha-synuclein aggregation in vitro (t50 117.0+/-9.8 vs.  
130 115.6+/-10.1), confirming that its effect in the PFF assay was the result of a cellular response  
131 rather than a direct interaction of the two (Fig.2F).

132

133 **Classical downstream effectors of mitochondrial dysfunction are unable to influence alpha-**  
134 **synuclein seeding**

135

136 Mitochondrial dysfunction is known to culminate in complex I inhibition, cytosolic calcium  
137 increase and oxidative stress, therefore we artificially mimicked these downstream effectors  
138 of mitochondrial dysfunction. 1-methyl-4-phenylpyridinium (MPP<sup>+</sup>), the active metabolite of  
139 1-methyl-4-phenyl-1,2,3,6-tetrahydropyridine (MPTP) was used to inhibit complex I of the  
140 electron transport chain, ionomycin, an ionophore, was used to increase cytosolic calcium  
141 concentration via calcium influx through the plasma membrane, and menadione was used to  
142 induce reactive oxygen species (ROS) generation via redox-cycling (Criddle *et al*, 2006). These  
143 chemicals were applied during the incubation with PFFs, and also during the 3 day incubation  
144 until seeding was evaluated. However, none of these treatments provoked increased YFP-  
145 alpha-synuclein seeding (Fig. 3A). Measuring cytosolic ATP levels, calcium levels and ROS

146 generation we show that treatment with MPP<sup>+</sup>, menadione and ionomycin led to either higher  
147 or comparable levels of ATP, calcium or ROS, respectively, than after treatment with either  
148 FCCP or BAPTA-AM, suggesting that complex I inhibition, cytosolic calcium increase and  
149 oxidative stress do not aggravate alpha-synuclein seeding per se (Fig. 3B and C).

150

151

### 152 **Inhibition of HtrA2 increases alpha-synuclein seeding**

153

154 The effect of BAPTA-AM on alpha-synuclein seeding was more pronounced compared to FCCP,  
155 since one hour pre-incubation with BAPTA-AM already aggravated alpha-synuclein seeding,  
156 however not the one hour pre-incubation with FCCP (Fig. 2A and 2E). Though, FCCP treatment  
157 led to increased mitochondrial fragmentation compared to BAPTA-AM (Fig. 3D and E),  
158 suggesting that there is no direct correlation between mitochondrial fragmentation and  
159 alpha-synuclein seeding propensity. BAPTA-AM has been reported to inhibit proteases (Da  
160 Cruz *et al*, 2011; Wang *et al*, 2001; Ray *et al*, 2002), which is mediated via the blocking of  
161 intracellular calcium transients required to regulate protease activity (Demartino *et al*, 1982;  
162 Mellgren, 1987). This could demonstrate a more enduring effect of BAPTA-AM and thus led  
163 us to investigate the effect of mitochondrial proteostasis on alpha-synuclein seeding.

164

165 Mitochondria present a very unique compartment for the folding of proteins, because the vast  
166 majority of proteins are imported as linear polypeptides that are folded once inside.  
167 Moreover, reactive oxygen species constantly arise due to oxidative phosphorylation which  
168 occurs at the inner mitochondrial membrane. Thus, it is not surprising that mitochondria are  
169 well equipped with chaperones and also proteases to control mitochondrial protein

170 homeostasis (Quirós *et al*, 2015). Intriguingly, mitochondrial proteases have recently been  
171 found to regulate the dissolution of cytosolic protein aggregates after heat shock (Ruan *et al*,  
172 2017) indicating that they are not only responsible for the maintenance of intra-mitochondrial  
173 proteins as previously assumed. We thus aimed to test if inhibition of mitochondrial proteases  
174 could influence alpha-synuclein seeding using the PFF assay as a model system. To test the  
175 role of the Lon-protease, a protease residing in the mitochondrial matrix, cells were treated  
176 with the Lon-inhibitor CDDO-Me (Gibellini *et al*, 2015). To investigate the role of high  
177 temperature requirement protein A2 (HtrA2/Omi), a protease residing in the mitochondrial  
178 intermembrane space (IMS), cells were treated with the inhibitor UCF-101 (Cilenti *et al*, 2003).  
179  
180 Both mitochondrial protease inhibitors significantly increased PFF-induced alpha-synuclein  
181 seeding (Fig. 4A). The effect upon inhibition of the Lon protease was lower than seen upon  
182 inhibition of HtrA2, although the Lon protease had previously been found to have the highest  
183 impact on the dissolution of aggregates after heat shock (Ruan *et al*, 2017). Interestingly,  
184 HtrA2 had previously been linked to PD (Strauss *et al*, 2005; Bogaerts *et al*, 2008; Unal  
185 Gulsuner *et al*, 2014), however genetic studies were not fully conclusive since pathological  
186 mutations of HtrA2 had also been reported in control subjects. Though, HtrA2 was  
187 encountered to be a constituent of protein aggregates in human alpha-synucleinopathies  
188 (Kawamoto *et al*, 2008; Strauss *et al*, 2005).

189

### 190 **Inhibition of mitochondrial protein import enhances alpha-synuclein seeding**

191

192 We isolated mitochondria from wild-type adult rat brain and demonstrated that they were  
193 positive for alpha-synuclein, and that proteinase K digestion was not able to degrade all alpha-



194 synuclein, indicating that some of the protein also resided within the organelle. If, however,  
195 0.1% Triton X-100 was added during the proteinase K digestion, alpha-synuclein was fully  
196 degraded as the detergent fully solubilizes mitochondrial membranes (Fig. 4B and C). This  
197 result could be further supported by transmission electron microscopy (TEM) of YFP alpha-  
198 synuclein SH-SY5Y cells, displaying alpha-synuclein staining inside mitochondria (Fig. 4D and  
199 Supplementary Fig. 2). Mitochondrial import of alpha-synuclein had been reported previously,  
200 but had been critically debated (Devi *et al*, 2008). However, several recent studies  
201 demonstrate that alpha-synuclein interacts with the mitochondria import receptor Tom20 (Di  
202 Maio *et al*, 2016; Ryan *et al*, 2018; Martínez *et al*, 2018). Thus, we hypothesized that inhibition  
203 of mitochondrial protein import might have a similar effect on alpha-synuclein seeding as the  
204 inhibition of proteases. Using Mitoblock-6, a small molecule inhibitor of protein translocation  
205 into mitochondria (Dabir *et al*, 2013), we observed increased alpha-synuclein seeding using  
206 the PFF assay (Fig. 4E), thus arguing for a direct role of mitochondrial proteostasis on alpha-  
207 synuclein homeostasis.

208

### 209 **Mitochondrial proteostasis regulates $\beta$ -amyloid 42 aggregation**

210

211 The above discussed mechanisms of mitochondrial proteostasis could have wider  
212 implications, and thus may not be unique to alpha-synuclein as suggested previously (Ruan *et*  
213 *al*, 2017). Therefore, we wanted to test if our findings on alpha-synuclein aggregation would  
214 be consistent within another aggregation model. To test this, we used a stable HEK cell line  
215 overexpressing A $\beta$ 42-mCherry via a tetracycline inducible expression system. After induction,  
216 these cells were treated for 24 hours with the different mitochondrial inhibitors. We found  
217 that both, FCCP and BAPTA-AM, increased the aggregation of native  $\beta$ -amyloid 42 (A $\beta$ 42), with

218 BAPTA-AM again having a more pronounced effect (Fig. 5A). In addition, inhibition of either  
219 HtrA2 with UCF-101 or of mitochondrial protein import with mitobloCK-6 significantly  
220 increased A $\beta$ 42 aggregation similar to our observations using alpha-synuclein (Fig. 5B and C).  
221 In addition, we have overexpressed HtrA2 in HEK A $\beta$ 42-mCherry cells and show that A $\beta$ 42  
222 aggregation is 50 % decreased by 50 % compared to control conditions demonstrating that  
223 HtrA2 plays a significant role in regulating the proteostasis of amyloidogenic proteins (Fig. 5D).

224

225

### 226 **In-vitro aggregation of $\beta$ -amyloid 42 is influenced by HtrA2**

227

228 To investigate the direct effect of mitochondria on protein aggregation in an isolated system,  
229 we analyzed A $\beta$ 42 protein in vitro aggregation via fluorescence lifetime of fluorescently  
230 labelled protein (Chan *et al*, 2013; Kaminski Schierle *et al*, 2011). For this, A $\beta$ 42 containing 50  
231 % Hylite<sup>TM</sup> Fluor 488 labelled A $\beta$ 42 was incubated for 2 hours at room temperature, the  
232 fluorescence lifetime of Hylite<sup>TM</sup> Fluor 488 dropped from 3380 +/- 93 ps to 3003 +/- 97 ps  
233 (timepoint 0 compared to timepoint 2 hrs, p = 0.0025, df 25) which is directly correlated with  
234 protein aggregation (Chen *et al*, 2017; Schierle *et al*, 2014). However, in the presence of  
235 isolated rat brain mitochondria, almost no drop in the fluorescence lifetime occurred  
236 (timepoint 0 = 3538 +/- 15 ps compared to timepoint 2hrs = 3502 +/- 5 ps, ns, Fig. 6A). Note,  
237 the lifetime is also higher at timepoint 0, which is due to the immediate aggregation of A $\beta$ 42  
238 in the control group. If the mitochondria were pre-incubated with UCF-101 which is inhibiting  
239 the HtrA2 protease, the fluorescence lifetime of Hylite<sup>TM</sup> Fluor 488 decreased over the 2 hour  
240 time period (timepoint 0 = 3523 +/- 16 ps compared to 2hrs = 3429 +/- 20 ps, p = 0.0009, df

241 27, Fig. 6B) which supports the hypothesis that mitochondria influence protein aggregation  
242 via proteolysis, however other proteases besides HtrA2 may also be involved.

243

244

## 245 **Discussion**

246

247 This study demonstrates that a decline in mitochondria fitness, whether by loss of  
248 mitochondrial integrity or by inhibiting the intramitochondrial protein homeostasis increases  
249 alpha-synuclein seeding. This is in accordance with the finding that mutations in genes  
250 encoding for PINK1 and parkin enhance alpha-synuclein aggregation, since defects in  
251 mitophagy equate to decreased mitochondrial fitness (Chung *et al*, 2016; Lu *et al*, 2009).  
252 However, as we have not found a direct contribution of downstream effects of mitochondrial  
253 dysfunction, we propose a direct link between mitochondrial protein uptake and degradation  
254 and alpha-synuclein seeding.

255

256 So far the effect of amyloidogenic proteins on mitochondria has been interpreted as a  
257 secondary pathological hallmark. It has been shown that alpha-synuclein as well as A $\beta$   
258 exacerbate mitochondrial dysfunction in vitro as well as in vivo (Cha *et al*, 2012; Subramaniam  
259 *et al*, 2014; Rui & Zheng, 2016). Alpha-synuclein and A $\beta$  have been reported to inhibit the  
260 uptake of mitochondrial proteins and A $\beta$  has been also shown to inhibit preprotein maturation  
261 (Di Maio *et al*, 2016; Cenini *et al*, 2016; Mossmann *et al*, 2014). We here pose the question of  
262 whether the import of amyloidogenic proteins into mitochondria is a physiological  
263 phenomenon or not. On one side, proteins might be imported into mitochondria since they  
264 exert a specific function as recently discussed for alpha-synuclein (Ludtmann *et al*, 2016). On

265 the other side, protein degradation via mitochondrial proteases within the organelle could  
266 demonstrate a general mechanism connected to cellular stress, as discussed recently for  
267 cytosolic protein dissolution after heat shock (Ruan *et al*, 2017). We have shown that alpha-  
268 synuclein is contained within mitochondria, the prerequisite for its degradation within the  
269 organelle. This is in accordance with previous papers, which have shown the uptake and  
270 preferential interaction of alpha-synuclein with mitochondria in vitro (Devi *et al*, 2008; Reeve  
271 *et al*, 2015; Robotta *et al*, 2014). Furthermore, alpha-synuclein has recently been found to  
272 interact with the mitochondrial import machinery, especially Tom20 as reported from three  
273 independent groups (Di Maio *et al*, 2016; Ryan *et al*, 2018; Martínez *et al*, 2018).

274

275 Interestingly, in our study inhibition of HtrA2 had the most significant effect on alpha-  
276 synuclein seeding. From the literature, we would have expected the strongest effect to occur  
277 via inhibition of the Lon protease, since it was found to have the most prominent contribution  
278 to the degradation of heat shock induced protein aggregation and is commonly described as  
279 the “master” protease (Ruan *et al*, 2017; Bezawork-Geleta *et al*, 2015; Gur & Sauer, 2008).  
280 Furthermore, the Lon protease resides in the matrix of mitochondria, while HtrA2 is confined  
281 to the intermembrane space. However, HtrA2 has previously been genetically linked to  
282 Parkinson’s disease (Strauss *et al*, 2005; Bogaerts *et al*, 2008; Westerlund *et al*, 2011; Unal  
283 Gulsuner *et al*, 2014; Chao *et al*, 2015) and a neuroprotective role of the protein has been  
284 suggested, since mice with mutant HtrA2 or HtrA2 knock out suffer from neurodegeneration  
285 (Jones *et al*, 2003; Martins *et al*, 2004). However, this has been puzzling so far, since HtrA2  
286 has been attributed a pro-apoptotic function in somatic cells, and thus a neuroprotective  
287 effect would have be expected upon knock out (Vaux & Silke, 2003). Thus, a direct role of

288 HtrA2 via its protease function is likely and is supported by the finding that HtrA2 interacts  
289 with presenilin-1 and A $\beta$  (Gray *et al*, 2000; Gupta *et al*, 2004; Liu *et al*, 2005; Park *et al*, 2004).

290

291 While we have not found a direct link between alpha-synuclein seeding and mitochondrial  
292 downstream effectors, such as complex I inhibition, ROS and calcium increase, this does not  
293 mean that they do not play an important role during the course of the disease. We strongly  
294 support the notion that calcium plays a role in PD, possibly affecting mitochondrial fitness  
295 when specific neuronal subtypes are subjected to increased calcium concentrations over long  
296 time periods as recently shown (Chan *et al*, 2007). That there has not been a direct effect of  
297 calcium on alpha-synuclein seeding was initially puzzling, since we and others have shown that  
298 calcium can accelerate alpha-synuclein aggregation in vitro (Nath *et al*, 2011; Lautenschläger  
299 *et al*, 2018). However, we have shown that calcium preferentially affected the lag time of  
300 alpha-synuclein aggregation kinetics, while the elongation was only slightly increased  
301 (Lautenschläger *et al*, 2018). Thus, if calcium only has an effect on the nucleation kinetics of  
302 alpha-synuclein aggregation we would not necessarily expect to observe an effect on alpha-  
303 synuclein seeding in cells (Buell *et al*, 2014).

304

305 It has been reported lately that mitochondrial heat shock proteins and proteases are  
306 upregulated in patients with AD, and also in patients with mild cognitive impairment  
307 (Sorrentino *et al*, 2017), indicating that these pathways are induced early on in disease.  
308 Furthermore, the translocase of the outer membrane 40 (Tom 40), the pore forming protein  
309 of the mitochondrial protein import complex, has been genetically linked to Alzheimer's and  
310 Parkinson's disease (Gottschalk *et al*, 2014). This demonstrates that mechanisms of  
311 mitochondrial proteostasis are extremely interesting to understand in more detail in order to

312 develop new concepts for therapeutical approaches. Taken together, our study shows that  
313 mitochondrial proteostasis is an important factor influencing the aggregation of alpha-  
314 synuclein and A $\beta$ 42, extending the concept of mitochondria as guardian in cytosol (MAGIC)  
315 (Ruan *et al*, 2017) to the degradation of amyloidogenic proteins and drawing a new picture on  
316 how mitochondria contribute to neurodegeneration.

317

318

## 319 **Material and Methods**

### 320 ***Human cell culture***

321 *Human neuroblastoma cells* (SH-SY5Y) were obtained from the European Collection of Cell  
322 Cultures (ECACC, Sigma-Aldrich, Dorset, UK) and grown in a 1:1 minimal essential medium  
323 (MEM) (Sigma-Aldrich) and nutrient mixture F-12 Ham (Sigma-Aldrich) supplemented with 15  
324 % FBS, 1 % non-essential amino-acids, 2 mM GlutaMAX and 1 % antibiotic-antimycotic (all  
325 Thermo Fisher Scientific, Epsom, UK). SH-SY5Y cells stably expressing YFP-alpha-synuclein  
326 were obtained by lentiviral transfection using 3<sup>rd</sup> generation lentiviruses (Addgene constructs:  
327 12251, 12253, 12259) (Dull *et al*, 1998). Human wildtype alpha-synuclein was inserted into  
328 EYFP plasmid (pEYFP-N1) using a 5 amino acid linker (sequence: GCACCGGTCGCCACC)  
329 between the C-terminus of alpha-synuclein and N-terminal EYFP. Alpha-synuclein-EYFP was  
330 then cloned into the pLJM1 backbone for lentiviral expression (Addgene: 19319) (Sancak *et al*,  
331 2008). For the preformed fibril (PFF) assay 50,000 cells were plated in MatTek dishes (P35G-  
332 1.5-14-C, MatTek Corporation, Ashland, US). For analysis of mitochondrial fragmentation cells  
333 were plated at 20,000 per well in Nunc<sup>TM</sup> Lab-Tek<sup>TM</sup> II Chambered Coverglass (8 well,  
334 155409, Thermo Fisher Scientific).

335 Flp-In<sup>TM</sup> T-REx<sup>TM</sup> 293 cell line (Invitrogen), a derivative of HEK293 cells containing a stably  
336 integrated FRT site and a TetR repressor, were used to generate stable cell lines expressing  
337 either mCherry or A $\beta$ 42-mCherry (pcDNA3.3-mCherry, pcDNA3.3-A $\beta$ 42-mCherry) under the  
338 Flp-In<sup>TM</sup> expression vector as described previously (Wu *et al*, 2014; Lu *et al*, 2019). Cells were  
339 maintained in DMEM high glucose media (Sigma-Aldrich) supplemented with 10% fetal bovine  
340 serum (FBS), 2 mM glutaMAX, and 1 % antibiotic-antimycotic (all Thermo Fisher Scientific).  
341 Cells were grown at 37°C under a 5% CO<sub>2</sub> atmosphere. Cells were plated at 35 000 cells per  
342 well in NUNC 24 well plates, and construct expression was induced for 3 days using media  
343 above with 1  $\mu$ g/mL tetracycline (Sigma Aldrich) added. All cell lines were tested for  
344 mycoplasma contamination using the MycoAlert<sup>TM</sup> PLUS mycoplasma detection kit (Lonza,  
345 Walkersville). For transient transfection of HtrA2 (Plun-Favreau *et al*, 2007) electroporation  
346 with the NEON transfection system was used (settings: 1050 V, 30 ms, 2 pulses; Thermo Fisher  
347 Scientific). pcDNA3-HtrA2-FLAG was a gift from L. Miguel Martins (Addgene plasmid # 15938;  
348 <http://n2t.net/addgene:15938>; RRID:Addgene\_15938).

349 Cell were imaged on a widefield microscope with IX83 frame (Olympus, Tokyo, Japan),  
350 HPLS343 plasma light source (Thorlabs, Newton, US), and Clara interline CCD camera (Andor,  
351 Belfast, UK), controlled by Micromanager (Edelstein *et al*, 2014). Respective filter cubes for  
352 YFP (excitation 500 nm, dichroic mirror 515 nm, emission 535 nm), RFP (excitation 560 nm,  
353 dichroic mirror 585 nm, emission 630 nm) and DAPI (excitation 350 nm, dichroic mirror 400  
354 nm, emission 460 nm) were used. Images for YFP-alpha-synuclein aggregation and DAPI were  
355 taken with an Olympus Plan Apo U 60x/1.42 oil objective lens. Imaging was done randomly by  
356 automated acquisition of a grid of 7x7 images per area. Aggregates were identified by their  
357 fibrillar nature, cell nuclei were counted using FIJI (Schindelin *et al*, 2012). For A $\beta$ 42-mCherry  
358 aggregation images were taken with an Olympus LUCPlanFLN 20x/0.45 air objective lens.

359 Aggregates were identified using the Thresholder plugin in ICY (de Chaumont *et al*, 2012). The  
360 cell surface area was evaluated using the HK-Means plugin for ICY (Arai & Barakbah, 2007).

361

### 362 ***Alpha-synuclein fibrils***

363 Human wild-type (WT) alpha-synuclein was expressed in Escherichia coli One Shot® BL21  
364 STAR™ (DE3) (Invitrogen, Thermo Fisher Scientific) cells using plasmid pT7-7 and purified using  
365 ion exchange on a HiPrep Q FF 16/10 anion exchange column (GE Healthcare, Uppsala,  
366 Sweden) (Huang *et al*, 2005). Alpha-synuclein was then further purified on a HiPrep Phenyl FF  
367 16/10 (High Sub) hydrophobic interaction column (GE Healthcare) (Campioni *et al*, 2014).  
368 Purification was performed on an ÄKTA Pure (GE Healthcare). Monomeric protein was  
369 dialyzed against 20 mM phosphate buffer pH 7.2, lyophilized in a LyoQuest 85 freeze-dryer  
370 (Telstar, Spain), and stored at -80 °C.

371 Alpha-synuclein fibrils were produced by diluting alpha-synuclein monomer solution to a  
372 concentration of 150 µM in 20 mM phosphate buffer, pH 7.2. Samples were incubated at 37°C  
373 for 5 days in 0.5 mL Protein Lobind tubes (Eppendorf, Hamburg, Germany) under continuous  
374 rotation at maximum speed (UVP HB-1000 Hybridizer, Fisher Scientific). Fibrils were diluted  
375 1:1 with 20 mM phosphate buffer, pH 7.2 to a final volume of 200 µL and sonicated (Digital  
376 Sonifier® SLPe, model 4C15, Branson, Danbury, USA) with six 10 sec pulses at 70 % amplitude  
377 and 10 sec pause after each sonication pulse. Sonicated fibrils were aliquoted, exposed to UV  
378 light for 30 min and frozen immediately after at -80C.

379 Alpha-synuclein fibrils were imaged by atomic force microscopy (AFM) (BioScope Catalyst  
380 microscope, Bruker AXS GmbH, Fitchburg, USA). Fibrils at an equivalent monomer  
381 concentration of 5 µM were deposited for 30 min on High Performance cover glass (PN  
382 474030-9020-000, Carl Zeiss Ltd.), cleaned for 30 min with 1 M KOH (Fluka, Bucharest,



383 Romania) and coated for 30 min with 0.01 % poly-L-Lysine beforehand (P4707, Sigma).  
384 Samples were rinsed 5 times with deionized water and dried under nitrogen flow. AFM data  
385 were acquired using PeakForce Quantitative Nanomechanical Property mapping mode with  
386 ScanAsyst-Fluid+ probes (Bruker AXS GmbH). Images were flattened and exported using  
387 NanoScope Analysis software, version 1.8.

388

### 389 ***Preformed fibril (PFF) assay***

390 For the induction of alpha-synuclein seeding, YFP-alpha-synuclein overexpressing SH-SY5Y  
391 cells were incubated with sonicated preformed alpha-synuclein fibrils as described by Luk et  
392 al. (Luk *et al*, 2009). Briefly, cells plated in MatTek dishes were washed with Neurobasal  
393 medium and subsequently changed to 500  $\mu$ L Neurobasal medium supplemented with 2 %  
394 B27 and 0.5 mM GlutaMAX (all Thermo Fisher Scientific). Cells were preincubated for 1 hour,  
395 either using 0.2 % DMSO for control or the respective treatment (see cell treatments below).  
396 8  $\mu$ L of PFFs were diluted with 32  $\mu$ L HBSS (HBSS minus calcium and magnesium, no phenol  
397 red, 14175-053, Thermo Fisher Scientific) and mixed briefly 5 times. Fibrils were added to the  
398 bottom of the BioPORTER tube (BioPORTER<sup>®</sup> Protein Delivery agent, BP502424, Gelantis, San  
399 Diego, USA), mixed 5 times and incubated for 5 min at room temperature, then vortexed for  
400 5 sec at 600 rpm (Stuart<sup>™</sup> Scientific SA8 vortex mixer, Sigma-Aldrich). 460  $\mu$ L OptiMEM  
401 medium (Thermo Fisher Scientific) were added to the BioPORTER tube plus the respective  
402 treatments and mixed 5 times. The PFF mixture was added dropwise to the cells, settled and  
403 then incubated for 4 hours at 37°C and 5 % CO<sub>2</sub>. Final monomer equivalent concentration of  
404 preformed fibrils was 600 nM.

405

406 After 4 hours cells were washed twice with 1 ml Neurobasal medium and changed  
407 subsequently to 2 mL of retinoic acid medium made of 1:1 minimal essential medium (MEM)  
408 (Sigma-Aldrich) and nutrient mixture F-12 Ham (Sigma-Aldrich) supplemented with 5 % FBS, 1  
409 % non-essential amino-acids, 2 mM GlutaMAX and 1 % antibiotic-antimycotic (all Thermo  
410 Fisher Scientific) and 1  $\mu$ M retinoic acid (Sigma-Aldrich) plus treatments if indicated and  
411 incubated for another 3 days to allow aggregate formation. Cells were fixed for 10 min using  
412 4 % formaldehyde in PBS supplemented with 4 % sucrose, 5 mM  $MgCl_2$  and 10 mM EGTA, pH  
413 7.4 (Marchenko & Flanagan, 2007), stained with Hoechst 33342 (Molecular Probes, Thermo  
414 Fisher Scientific) 1:2000 in PBS for 30 min.

415

#### 416 ***Cell treatments***

417 Chemical used for the treatment of cells were prepared as followed, with final dilution made  
418 with the respective culture medium. Carbonyl cyanide 4-(trifluoromethoxy)phenylhydrazone  
419 (FCCP, Abcam, Cambridge, UK) 1 mM in DMSO, N-Methyl-4-phenylpyridinium Iodide (MPP+,  
420 Sigma-Aldrich) 10 mM in water, ionomycin (ab120370, Abcam) 10 mM and 1 mM in DMSO, 2-  
421 Deoxyglucose (Sigma-Aldrich) 0.5 M in water, menadione (Sigma-Aldrich) 1.5 mM in DMSO,  
422 BAPTA-AM (ab120503, Abcam) 2.5 mM in DMSO, BAPTA (ab144924, Abcam) 1 mM in water,  
423 CDDO-Me (Sigma-Aldrich) 1 mM in DMSO, UCF-101 (Sigma-Aldrich) 10 mM in DMSO and  
424 MitobloCK-6 (Focus Biomolecules) 5 mM in DMSO.

425

#### 426 ***Immunofluorescence***

427 Cells were fixed as described above, blocking and permeabilization were performed using 5 %  
428 donkey serum in 0.05 % Tween-20 in phosphate buffered saline (PBS) for 1 h. Primary  
429 antibodies were incubated overnight at 4°C, followed by 5 washes with PBS. Secondary  
430 antibodies were incubated for 1 hour at room temperature, followed by 5 washes with PBS.  
431 As primary antibodies anti-Ubiquitin antibody, clone Apu2 (05-1307, 1:200, Millipore,  
432 Watford, United Kingdom), anti-Ubiquitin-binding protein p62, clone 2C11 (SQSTM1, 1:200,  
433 Abnova, Taipei, Taiwan) and anti-FLAG® M2 antibody (F1804, 1:200, Sigma-Aldrich) were  
434 used. As secondary antibodies anti-rabbit and anti-mouse Alexa Fluor®647, and anti-mouse  
435 Alexa Fluor®568 (A-21245, A-21236 and A-11031 from life technologies) were used. Samples  
436 were kept in PBS containing 5 mM sodium azide (Sigma-Aldrich).

437

#### 438 ***Structured illumination microscopy (SIM)***

439 Structured illumination images were collected on a custom built Structured Illumination  
440 Microscopy (SIM) setup which has been described in detail (Young *et al*, 2016). A 60×/1.2NA  
441 water immersion lens (UPLSAPO 60XW, Olympus) focused the structured illumination pattern  
442 onto the sample. This lens also captured the samples' fluorescence emission light before  
443 imaging onto a sCMOS camera (C11440, Hamamatsu). Laser excitation wavelengths used were  
444 488 nm (iBEAM-SMART-488, Toptica), 561 nm (OBIS 561, Coherent), and 640 nm (MLD 640,  
445 Cobolt). Respective emission filters were BA 510-550 (Olympus), BrightLine FF01-600/37, and  
446 BrightLine FF01-676/29 (Semrock, New York, US). Imaging was done in fixed cells or live cells,  
447 as indicated. Images were acquired using custom SIM software (HClmage, Mamamatsu  
448 Corporation, Sewickley, US). Nine raw images were collected at each plane and each color.  
449 FairSIM plugin in FIJI was used to reconstruct images (Müller *et al*, 2016).

450

451 ***FLIM measurements of cytosolic calcium, H<sub>2</sub>O<sub>2</sub>, and ATP***

452 Fluorescence lifetime microscopy (FLIM) was carried out on a custom-built Time-Correlated  
453 Single Photon Counting (TCSPC) system using a super-continuum laser (SC450, Fianium) with  
454 a pulse repetition rate of 40 MHz, a confocal scanning unit (FluoView 300, Olympus) coupled  
455 with an inverted microscope frame (IX70, Olympus), and a time-correlated single photon  
456 counting system (Becker & Hickl GmbH) as described in detail before (Chen *et al*, 2015). The  
457 excitation wavelength was selected by using an acousto-optic tunable filter (AOTFnc-400.650,  
458 Quanta Tech) and respective excitation filters (to improve the wavelength selection), and  
459 emission fluorescence was imaged through respective emission filters. The data acquisition  
460 time was 200s for each FLIM image (10 cycles, 20s per cycle). The photon detection rate was  
461 kept below 2% of the laser repetition rate in order to avoid photon pile-up.

462 For cytosolic calcium measurements SH-SY5Y cells were incubated with Oregon Green<sup>TM</sup> 488  
463 BAPTA-1, AM (Thermo Fisher Scientific) for 45 min at 1  $\mu$ M concentration. Excitation was set  
464 to 475 nm, excitation filter BrightLine FF01-474/27 (Semrock), and emission filter BrightLine  
465 FF01-525/39 (Semrock) were used. For measurement of H<sub>2</sub>O<sub>2</sub> and ATP SH-SY5Y cells were  
466 transiently transfected with the respective sensor using electroporation with the NEON  
467 transfection system (settings: 1100 V, 50 ms, 1 pulse; Thermo Fisher Scientific). Hyper  
468 (Belousov *et al*, 2006) was used to measure cytosolic hydrogen peroxide, excitation was set  
469 to 470 nm, same excitation and emission filters as for Oregon Green<sup>TM</sup> 488 BAPTA-1 were  
470 used. Ateam1.03 (Imamura *et al*, 2009; Kotera *et al*, 2010) was used to measure ATP levels,  
471 excitation was set to 435 nm, excitation filter BrightLine FF01-434/17 (Semrock), and emission  
472 filter BrightLine FF01-470/28 (Semrock) were used. ATeam1.03-nD/nA/pcDNA3 was a gift  
473 from Takeharu Nagai (Addgene plasmid # 51958; <http://n2t.net/addgene:51958>;

474 RRID:Addgene\_51958). For ATP measurements cells were subjected to media containing 10  
475 mM 2-Deoxyglucose to inhibit glycolysis. Lifetime of the FRET donor was analyzed by the  
476 FLIMfit software tool developed at Imperial College London (Görlitz *et al*, 2017; Warren *et al*,  
477 2013).

478

#### 479 ***ThT Assay***

480 The aggregation of alpha-synuclein in vitro was measured by Thioflavin T (ThT) assay. Briefly,  
481 50  $\mu$ L of 100  $\mu$ M alpha-synuclein with 10  $\mu$ M fresh ThT added, was incubated for 7 days with  
482 1% DMSO as a control, 10  $\mu$ M FCCP, 10  $\mu$ M BAPTA-AM, or 10  $\mu$ M BAPTA. Assays were  
483 performed in NUNC™ black 384-well plates with optical flat bottom (142761, Thermo Fisher  
484 Scientific) which were sealed with an Ampliseal transparent microplate sealer (Greiner Bio-  
485 One GmbH). Plates were incubated with orbital shaking at 300 rpm for 5 minutes before each  
486 read every hour at 37 °C for 170 cycles. The readings of ThT fluorescence intensity were taken  
487 using excitation at 440 nm and emission at 480 nm, collected from the bottom up with 20  
488 flashes per well and a gain setting of 1300 (FLUOstar Omega, BMG Labtec GmbH, Ortenberg,  
489 Germany). Experiments were repeated three times with four replicates for each condition.

490

#### 491 ***Mitochondrial fragmentation***

492 To label mitochondria SH-SY5Y cells were incubated over night with 1:1000 CellLight™  
493 Mitochondria-RFP (Thermo Fisher Scientific) and imaged by SIM or a widefield microscope for  
494 quantification. Images were taken randomly by automated imaging of a grid, images were  
495 analyzed from 3 biological repeats. Mitochondrial length was evaluated using the NIEL Mito  
496 algorithm (Lautenschläger *et al*, 2015; Herbert *et al*, 2014).

497

498 **Animals**

499 Adult female Sprague Dawley rats were supplied by Charles River UK Ltd., Scientific, Breeding  
500 and Supplying Establishment, registered under Animals (Scientific Procedures) Act 1986, and  
501 AAALAC International accredited. All animal work conformed to guidelines of animal  
502 husbandry as provided by the UK Home Office. Animals were sacrificed under schedule 1;  
503 procedures that do not require specific Home Office approval. Animal work was approved by  
504 the NACWO and University of Cambridge Ethics Board.

505

506 **Mitochondrial isolation and Western blot analysis**

507 Mitochondria were isolated from adult rat brain by differential centrifugation using  
508 mitochondria isolation kit for tissue (ab110168, abcam). Western blot for alpha-synuclein was  
509 performed using 4–12% Bis-Tris gels (Life Technologies), the protein was transferred onto 0.45  
510  $\mu\text{m}$  Millipore PVDF membrane (Fisher Scientific, Loughborough, UK) and subsequently fixed  
511 using 4% formaldehyde + 0.1% glutaraldehyde in PBS (both Sigma-Aldrich) (Lee & Kamitani,  
512 2011). As primary antibody  $\alpha$ -Synuclein (D37A6) XP<sup>®</sup> Rabbit mAb was used (1:1000 dilution,  
513 #4179, CST, Leiden, Netherlands). An enhanced chemoluminescence (ECL)-horse radish  
514 peroxidase (HRP) conjugated secondary antibody (NA934V, 1:1000 dilution, GE Healthcare,  
515 Uppsala, Sweden) and SuperSignal West Femto Chemiluminescent Substrate (Thermo Fisher  
516 Scientific) were used to probe the membrane, which was exposed using a G:BOX (Syngene,  
517 Cambridge, UK). Western blots were analyzed in FIJI (Schindelin *et al*, 2012).

518

519 **TEM**

520 SH-SY5Y cells and SH-SY5Y cells overexpressing YFP-alpha-synuclein were cultured in 6 well  
521 plates (Greiner Bio-One GmbH) at 350 000 per well. After reaching confluency cells were  
522 washed with 0.9% NaCl (Sigma-Aldrich) twice and incubated with 8% formaldehyde in 0.05 M  
523 sodium cacodylate buffer (Paraformaldehyd from Merck, Darmstadt, Germany) pH 7.4 for 2h  
524 at 4°C. Cells were scraped from 6 wells and centrifuged for 10 min at 3500 g. Cells were  
525 washed 5 times in 0.05 M sodium cacodylate buffer, 3 times in deionized water, and incubated  
526 with 2 % uranyl acetate in 0.05 maleate buffer pH 5.2 (both BDH Chemicals Ltd., Dorset, UK)  
527 overnight at 4°C. Cells were washed again and dehydrated at increasing ethanol  
528 concentrations (1x 50% EtOH, 3x 70% EtOH, 3x 95 % EtOH, 3x 100% EtOH, 3x 100 % dry EtOH;  
529 5 min in each, Sigma-Aldrich). Cells were resuspended in LRW resin (LR White Resin, London  
530 Resin (Hard), Agar Scientific, Stansted, UK) mixed 50/50 with dry 100% EtOH and incubated  
531 overnight at room temperature. The following day, cells were spun down, and resuspended  
532 in pure LRW for 2 days, where LRW was exchanged twice. Cells were centrifuged at 13000 g  
533 to form a firm pellet, which was transferred to size 2 gelatine embedding capsules (TAAB,  
534 Aldermaston, UK) containing LRW resin. Gelatine capsules were covered with a glass coverslip  
535 to exclude any air and the resin was cured at 60°C for 2 days. Gelatine capsule were removed  
536 and ultrathin sections were cut using a Leica Ultracut E Ultramicrotome (Leica, Wetzlar,  
537 Germany) and placed on 400 mesh nickel/formvar film grids (EM Resolutions). Sections were  
538 stained with Anti-GFP antibody (ab6556, Abcam) in blocking solution (2 % BSA (BBITM  
539 solutions, Crumlin, UK) in 10 mM TRIS (Sigma-Aldrich) buffer pH 7.4 containing 0.001% Triton-  
540 X100 (Calbiochem, San Diego, US) and 0.001% Tween20 (Sigma-Aldrich) at 1:100 overnight.  
541 After washing, sections were incubated with goat anti rabbit 10 nm gold secondary antibody  
542 (BBITM solutions) in blocking solution at 1:200 for 1 hour. Sections were washed with washing  
543 buffer (same as above omitting BSA), deionized water and left for drying overnight. Post-

544 staining included 2% uranyl acetate in 50 % methanol for 30 sec, followed by washing with 50  
545 % methanol and 30 sec staining in Reynold's lead citrate (lead nitrate from BDH Biochemicals  
546 Ltd., Trisodiumcitrate from Sigma-Aldrich). Grids were rinsed thoroughly with deionized water  
547 and dried before imaging. Grids were imaged in a FEI Tecnai G2 electron microscope (Thermo  
548 Fisher Scientific) run at 200 keV using a 20  $\mu$ m objective aperture, images were taken using an  
549 AMT V600 camera (AMT, Woburn, US).

550

### 551 **In-vitro measurements of A $\beta$ 42 aggregation**

552 Synthetic A $\beta$ 42 and A $\beta$ 42 Hilyte™ Fluor 488 (both from Anaspec, Seraing, Belgium) were  
553 prepared as previously described (Sum *et al*, 2016). Briefly, lyophilized A $\beta$ 42 (1 mg) was  
554 dissolved in ice cold trifluoroacetic acid (200  $\mu$ L), sonicated at 0 °C for 60 s and then lyophilized  
555 overnight. Ice cold 1,1,1,3,3,3-hexafluoro-2-propanol (1 mL) was added, sonicated at 0 °C for  
556 60 s and aliquoted as 20  $\mu$ L units. The samples were lyophilized overnight and were stored at  
557 -80 °C until use. Lyophilized A $\beta$ 42 Hilyte™ Fluor 488 peptide (0.1 mg) was dissolved in 1%  
558 NH<sub>4</sub>OH (200  $\mu$ L) and sonicated for 60 s at 0 °C. The sample was aliquoted into 5  $\mu$ L units, snap  
559 frozen in liquid nitrogen and stored at -80 °C. Immediately before the experiment unlabeled  
560 A $\beta$ 42 was prepared by adding first dimethyl sulfoxide (DMSO) (5% of total solvent volume),  
561 then sodium phosphate buffer (NaP buffer 50mM, pH 7.4) to reach a concentration of 20  $\mu$ M.  
562 The solution was sonicated at 0 °C for 3 min and centrifuged at 13,400 rpm at 0 °C for 30 min.  
563 Then the sample was further diluted to 5  $\mu$ M concentration with NaP buffer. Also the labelled  
564 A $\beta$ 42 Hilyte™ Fluor 488 was brought to 5  $\mu$ M concentration in NaP buffer and both were mixed  
565 in 1:1 ratio. Samples were prepared on ice adding A $\beta$ 42, 1 mg/mL of purified mitochondria  
566 (preparation see above) and 20  $\mu$ M UCF-101. Mitochondria isolation buffer and DMSO were  
567 added in control samples. 12  $\mu$ L volume were pipetted in silicon gaskets (Thermo Fisher



568 Scientific, P24742) on a coverslip and measured at room temperature. Fluorescence lifetime  
569 measurements (FLIM) were carried out on a custom-built Time-Correlated Single Photon  
570 Counting (TCSPC) system as described above (see FLIM measurements of cytosolic calcium,  
571 H<sub>2</sub>O<sub>2</sub>, and ATP).

572

### 573 **Statistics**

574 Statistical analysis was performed using GraphPad Prism 6.07 (GraphPad Software, Inc., La  
575 Jolla, CA, USA). Values are given as mean ± SEM unless otherwise stated. Normal distribution  
576 was tested using Shapiro-Wilk test. Two-tailed unpaired t-test was used upon normal  
577 distribution, two-tailed Mann-Whitney U test was used when no normal distribution was  
578 given. For multiple comparisons either one-way ANOVA with Dunnett's post hoc correction  
579 upon normal distribution or Kruskal-Wallis test with Dunn's multiple comparison when no  
580 normal distribution was given were performed. Significance was considered at  $p < 0.05$ .

581

### 582 **Data availability.**

583 All relevant data are available from the corresponding authors.

584

585

586

587

588

589

590

591 **Acknowledgements**

592 We would like to thank Karin H. Muller and Jeremy N. Skepper for their help and input for the  
593 transmission electron microscopy study. We would like to thank Samantha Beck for  
594 establishing the YFP-alpha-synuclein SH-SY5Y cell line. J.L. was supported by a research  
595 fellowship from the Deutsche Forschungsgemeinschaft (DFG; award LA 3609/2-1). C.F.K.  
596 acknowledges funding from the UK Engineering and Physical Sciences Research Council  
597 (EPSRC). G.S.K.S. and C.F.K. acknowledge funding from the Wellcome Trust, the UK Medical  
598 Research Council (MRC), Alzheimer Research UK (ARUK), and Infinitus China Ltd. J.L. and A.D.S.  
599 acknowledge Alzheimer Research UK (ARUK) travel grants.

600

601 **Author contributions**

602 J.L., A.F.V. and A.M. contributed to alpha-synuclein PFF assay and cell work. J.L. performed  
603 FLIM experiments and mitochondrial morphology analysis. A.D.S. performed alpha-synuclein  
604 in vitro work. J.L. and A.F.V. and C.H. contributed to Western blot analyses. J.L. performed  
605 TEM. J.L., S.W.V. and M.L. contributed to A $\beta$ 42 studies. J.M. and M.F. contributed to  
606 automated and SIM imaging. J.L. designed the experiments. J.L., C.F.K. and G.S.K.S. conducted  
607 the overall manuscript.

608

609 **Conflict of interest**

610 The authors declare no conflict of interest.

611

612

613

## 614 **The Paper Explained**

615 **PROBLEM:** Neurodegenerative diseases like Alzheimer's and Parkinson's disease put a high  
616 social and economic burden on modern societies. Since the early 1990s, protein aggregation  
617 is found as an overarching phenomenon of these diseases, however, we still do not  
618 understand why proteins start to undergo aggregation, particularly in sporadic cases of  
619 disease, which represent the majority.

620 **RESULTS:** Here, we demonstrate that the aggregation of proteins relevant to  
621 neurodegenerative diseases, like alpha-synuclein in Parkinson's disease and Amyloid-beta 42  
622 in Alzheimer's disease, is alleviated by mitochondrial degradation of these proteins. We show  
623 that alpha-synuclein is contained within mitochondria and that the inhibition of mitochondrial  
624 uptake of proteins, as well as inhibition of protein degrading enzymes within the  
625 mitochondria, aggravate the seeding of alpha-synuclein aggregation. This implies that this  
626 mechanism is relevant to late disease stages, when alpha-synuclein aggregation is already  
627 initiated. Furthermore, we demonstrate that the aggregation of Abeta 42 is increased upon  
628 inhibition of these mechanisms and that aggregation can be decreased by overexpression of  
629 a mitochondrial protease. Taken together, this shows that mitochondrial protein degradation  
630 demonstrates a general mechanism influencing the homeostasis of aggregation prone  
631 proteins.

632 **IMPACT:** It was highlighted recently that mitochondria are able to degrade cytosolic proteins,  
633 however thus far it has only been speculated that this is the case for proteins relevant to  
634 neurodegeneration. Our results directly link mitochondrial dysfunction to protein  
635 aggregation, which could have major implication to explain the sporadic occurrence of  
636 neurodegenerative diseases upon a decline in mitochondrial fitness after chronic exposure to  
637 environmental toxins or aging per se.

638

639 **References**

640 Arai K & Barakbah AR (2007) Hierarchical K-means: an algorithm for centroids initialization  
641 for K-means. *Rep. Fac. Sci. Engrg. Reports Fac. Sci. Eng. Saga Univ. Saga Univ.* **36**: 36–  
642 125

643 Belousov V V, Fradkov AF, Lukyanov KA, Staroverov DB, Shakhbazov KS, Terskikh A V &  
644 Lukyanov S (2006) Genetically encoded fluorescent indicator for intracellular hydrogen  
645 peroxide. *Nat. Methods* **3**: 281–286

646 Betarbet R, Sherer TB, Mackenzie G, Garcia-osuna M, Panov A V & Greenamyre JT (2000)  
647 Chronic systemic pesticide exposure reproduces features of Parkinson's disease. *Nat.*  
648 *Neurosci.* **3**: 1301–1306

649 Bezawork-Geleta A, Brodie EJ, Dougan DA & Truscott KN (2015) LON is the master protease  
650 that protects against protein aggregation in human mitochondria through direct  
651 degradation of misfolded proteins. *Sci. Rep.* **5**: doi: 10.1038/srep17397 Available at:  
652 <http://www.nature.com/articles/srep17397>

653 Bogaerts V, Nuytemans K, Reumers J, Pals P, Engelborghs S, Pickut B, Corsmit E, Peeters K,  
654 Schymkowitz J, De Deyn PP, Cras P, Rousseau F, Theuns J & Van Broeckhoven C (2008)  
655 Genetic variability in the mitochondrial serine protease HTRA2 contributes to risk for  
656 Parkinson disease. *Hum. Mutat.* **29**: 832–840

657 Buell AK, Galvagnion C, Gaspar R, Sparr E, Vendruscolo M, Knowles TPJ, Linse S & Dobson CM  
658 (2014) Solution conditions determine the relative importance of nucleation and growth  
659 processes in  $\alpha$ -synuclein aggregation. *Proc. Natl. Acad. Sci.* **111**: 7671–7676 Available at:  
660 <http://www.pnas.org/cgi/doi/10.1073/pnas.1315346111>

- 661 Burns RS, Chiueh CC, Markey SP, Ebert MH, Jacobowitz DM & Kopin IJ (1983) A primate  
662 model of parkinsonism: selective destruction of dopaminergic neurons in the pars  
663 compacta of the substantia nigra by N-methyl-4-phenyl-1,2,3,6-tetrahydropyridine.  
664 *Proc. Natl. Acad. Sci.* **80**: 4546–4550 Available at:  
665 <http://www.pnas.org/cgi/doi/10.1073/pnas.80.14.4546>
- 666 Campioni S, Carret G, Jordens S, Ce Nicoud L, Mezzenga R & Riek R (2014) The Presence of an  
667 Air–Water Interface Affects Formation and Elongation of  $\alpha$ -Synuclein Fibrils.
- 668 Cenini G, Rub C, Bruderek M & Voos W (2016) Amyloid  $\beta$ -peptides interfere with  
669 mitochondrial preprotein import competence by a coaggregation process. *Mol. Biol.*  
670 *Cell* **27**: 3257–3272 Available at: [http://www.molbiolcell.org/cgi/doi/10.1091/mbc.E16-](http://www.molbiolcell.org/cgi/doi/10.1091/mbc.E16-05-0313)  
671 [05-0313](http://www.molbiolcell.org/cgi/doi/10.1091/mbc.E16-05-0313)
- 672 Cha MY, Han SH, Son SM, Hong HS, Choi YJ, Byun J & Mook-Jung I (2012) Mitochondria-  
673 specific accumulation of amyloid  $\beta$  induces mitochondrial dysfunction leading to  
674 apoptotic cell death. *PLoS One* **7**:
- 675 Chan CS, Guzman JN, Ilijic E, Mercer JN, Rick C, Tkatch T, Meredith GE & Surmeier DJ (2007)  
676 ‘Rejuvenation’ protects neurons in mouse models of Parkinson’s disease. *Nature* **447**:  
677 1081–1086
- 678 Chan FTS, Schierle GSK, Kumita JR, Bertoncini CW, Dobson CM & Kaminski CF (2013) Protein  
679 amyloids develop an intrinsic fluorescence signature during aggregation. *Analyst* **138**:  
680 2156–2162
- 681 Chao YX, Ng EY, Foo JN, Liu J, Zhao Y & Tan EK (2015) Mitochondrial serine protease HTRA2  
682 gene mutation in Asians with coexistent essential tremor and Parkinson disease.  
683 *Neurogenetics* **16**: 241–242

- 684 de Chaumont F, Dallongeville S, Chenouard N, Hervé N, Pop S, Provoost T, Meas-Yedid V,  
685 Pankajakshan P, Lecomte T, Le Montagner Y, Lagache T, Dufour A & Olivo-Marin J-C  
686 (2012) Icy: an open bioimage informatics platform for extended reproducible research.  
687 *Nat. Methods* **9**: 690–696 Available at:  
688 <http://www.nature.com/doi/10.1038/nmeth.2075>
- 689 Chen W, Young LJ, Lu M, Zaccane A, Strohl F, Yu N, Schierle GSK & Kaminski CF (2017)  
690 Fluorescence self-quenching from reporter dyes informs on the structural properties of  
691 amyloid clusters formed in vitro and in cells. *Nano Lett.* **17**: 143–149
- 692 Chen WY, Avezov E, Schlachter SC, Gielen F, Laine RF, Harding HP, Hollfelder F, Ron D &  
693 Kaminski CF (2015) A method to quantify FRET stoichiometry with phasor plot analysis  
694 and acceptor lifetime ingrowth. *Biophys. J.* **108**: 999–1002 Available at:  
695 <http://dx.doi.org/10.1016/j.bpj.2015.01.012>
- 696 Chung SY, Kishinevsky S, Mazzulli JR, Graziotto J, Mrejeru A, Mosharov E V., Puspita L,  
697 Valiulahi P, Sulzer D, Milner TA, Taldone T, Krainc D, Studer L & Shim J won (2016)  
698 Parkin and PINK1 Patient iPSC-Derived Midbrain Dopamine Neurons Exhibit  
699 Mitochondrial Dysfunction and  $\alpha$ -Synuclein Accumulation. *Stem Cell Reports* **7**: 664–677  
700 Available at: <http://dx.doi.org/10.1016/j.stemcr.2016.08.012>
- 701 Cilenti L, Lee Y, Hess S, Srinivasula S, Park KM, Junqueira D, Davis H, Bonventre J V., Alnemri  
702 ES & Zervos AS (2003) Characterization of a novel and specific inhibitor for the pro-  
703 apoptotic protease Omi/HtrA2. *J. Biol. Chem.* **278**: 11489–11494
- 704 Criddle DN, Gillies S, Baumgartner-Wilson HK, Jaffar M, Chinje EC, Passmore S, Chvanov M,  
705 Barrow S, Gerasimenko O V., Tepikin A V., Sutton R & Petersen OH (2006) Menadione-  
706 induced reactive oxygen species generation via redox cycling promotes apoptosis of

- 707 murine pancreatic acinar cells. *J. Biol. Chem.* **281**: 40485–40492
- 708 Da Cruz LN, Alves E, Leal MT, Juliano MA, Rosenthal PJ, Juliano L & Garcia CRS (2011) FRET  
709 peptides reveal differential proteolytic activation in intraerythrocytic stages of the  
710 malaria parasites *Plasmodium berghei* and *Plasmodium yoelii*. *Int. J. Parasitol.* **41**: 363–  
711 372 Available at: <http://dx.doi.org/10.1016/j.ijpara.2010.10.009>
- 712 Dabir D V., Hasson SA, Setoguchi K, Johnson ME, Wongkongkathep P, Douglas CJ,  
713 Zimmerman J, Damoiseaux R, Teitell MA & Koehler CM (2013) A small molecule  
714 inhibitor of redox-regulated protein translocation into mitochondria. *Dev. Cell* **25**: 81–  
715 92 Available at: <http://dx.doi.org/10.1016/j.devcel.2013.03.006>
- 716 Demartino GN, Croall DE & Calcium-dependent DE (1982) Calcium-Dependent Proteases in  
717 Neuroblastoma Cells.
- 718 Devi L, Raghavendran V, Prabhu BM, Avadhani NG & Anandatheerthavarada HK (2008)  
719 Mitochondrial import and accumulation of  $\alpha$ -synuclein impair complex I in human  
720 dopaminergic neuronal cultures and Parkinson disease brain. *J. Biol. Chem.* **283**: 9089–  
721 9100
- 722 Dull T, Zufferey R, Kelly M, Mandel RJ, Nguyen M, Trono D & Naldini L (1998) A third-  
723 generation lentivirus vector with a conditional packaging system. *J. Virol.* **72**: 8463–71  
724 Available at:  
725 <http://www.ncbi.nlm.nih.gov/pubmed/9765382>  
726 <http://www.pubmedcentral.nih.gov/articlerender.fcgi?artid=PMC110254>
- 727 Edelstein AD, Tsuchida MA, Amodaj N, Pinkard H, Vale RD & Stuurman N (2014) Advanced  
728 methods of microscope control using  $\mu$ Manager software. *J. Biol. Methods* **1**: 10  
729 Available at: <http://www.jbmethods.org/jbm/article/view/36>

- 730 Follett J, Darlow B, Wong MB, Goodwin J & Pountney DL (2013) Potassium depolarization  
731 and raised calcium induces  $\alpha$ -synuclein aggregates. *Neurotox. Res.* **23**: 378–92 Available  
732 at: <http://www.ncbi.nlm.nih.gov/pubmed/23250862>
- 733 Friedman JR, Lackner LL, West M, DiBenedetto JR, Nunnari J & Voeltz GK (2011) ER Tubules  
734 Mark Sites of Mitochondrial Division. *Science (80-. )*. **334**: 358–362 Available at:  
735 <http://www.sciencemag.org/cgi/doi/10.1126/science.1207385>
- 736 Gibellini L, Pinti M, Bartolomeo R, De Biasi S, Cormio A, Musicco C, Carnevale G, Pecorini S,  
737 Nasi M, De Pol A & Cossarizza A (2015) Inhibition of Lon protease by triterpenoids alters  
738 mitochondria and is associated to cell death in human cancer cells. *Oncotarget* **6**:  
739 25466–83 Available at: <http://www.ncbi.nlm.nih.gov/pubmed/26314956>
- 740 Görlitz F, Kelly DJ, Warren SC, Alibhai D, West L, Kumar S, Alexandrov Y, Munro I, Garcia E,  
741 McGinty J, Talbot C, Serwa RA, Thinon E, da Paola V, Murray EJ, Stuhmeier F, Neil MAA,  
742 Tate EW, Dunsby C & French PMW (2017) Open Source High Content Analysis Utilizing  
743 Automated Fluorescence Lifetime Imaging Microscopy. *J. Vis. Exp.*: 1–11 Available at:  
744 [http://www.jove.com/video/55119/open-source-high-content-analysis-utilizing-](http://www.jove.com/video/55119/open-source-high-content-analysis-utilizing-automated-fluorescence)  
745 [automated-fluorescence](http://www.jove.com/video/55119/open-source-high-content-analysis-utilizing-automated-fluorescence)
- 746 Gottschalk WK, Lutz MW, He YT, Saunders AM, Daniel K, Roses AD, Chiba-falek O & Hill C  
747 (2014) The Broad Impact of TOM40 on Neurodegenerative Diseases in Aging. *J Park. Dis*  
748 *Alzheimers Dis* **1**: 1–25
- 749 Gray CW, Ward R V., Karran E, Turconi S, Rowles A, Viglienghi D, Southan C, Barton A,  
750 Fantom KG, West A, Savopoulos J, Hassan NJ, Clinkenbeard H, Hanning C, Amegadzie B,  
751 Davis JB, Dingwall C, Livi GP & Creasy CL (2000) Characterization of human HtrA2, a  
752 novel serine protease involved in the mammalian cellular stress response. *Eur. J.*



- 753 *Biochem.* **267**: 5699–5710
- 754 Greenamyre JT, Sherer TB, Betarbet R & Panov a V (2001) Complex I and Parkinson’s  
755 disease. *IUBMB Life* **52**: 135–141
- 756 Gupta S, Singh R, Datta P, Zhang ZJ, Orr C, Lu Z, DuBois G, Zervos AS, Meisler MH, Srinivasula  
757 SM, Fernandes-Alnemri T & Alnemri ES (2004) The C-terminal tail of presenilin regulates  
758 Omi/HtrA2 protease activity. *J. Biol. Chem.* **279**: 45844–45854
- 759 Gur E & Sauer RT (2008) Recognition of misfolded proteins by Lon, a AAA+ protease. *Genes*  
760 *Dev.* **22**: 2267–2277
- 761 Herbert S, Ortmann W, Lautenschl J, Marco K, Grosskreutz J & Denzler J (2014) Quantitative  
762 Analysis of Pathological Mitochondrial Morphology in Neuronal Cells in Confocal Laser  
763 Scanning Microscopy Images. *Proc. IWBBIO*: 1290–1301
- 764 Huang C, Ren G, Zhou H & Wang C (2005) A new method for purification of recombinant  
765 human alpha-synuclein in Escherichia coli. *Protein Expr. Purif.* **42**: 173–177
- 766 Imamura H, Nhat KPH, Togawa H, Saito K, Iino R, Kato-Yamada Y, Nagai T & Noji H (2009)  
767 Visualization of ATP levels inside single living cells with fluorescence resonance energy  
768 transfer-based genetically encoded indicators. *Proc. Natl. Acad. Sci. U. S. A.* **106**: 15651–  
769 15656
- 770 Jones JM, Datta P, Srinivasula SM, Ji W, Gupta S, Zhang ZJ, Davies E, Hajnóczky G, Saunders  
771 TL, Van Keuren ML, Fernandes-Alnemri T, Meisler MH & Alnemri ES (2003) Loss of Omi  
772 mitochondrial protease activity causes the neuromuscular disorder of mnd2 mutant  
773 mice. *Nature* **425**: 721–727
- 774 Kaminski Schierle GS, Bertoncini CW, Chan FTS, Van Der Goot AT, Schwedler S, Skepper J,  
775 Schlachter S, Van Ham T, Esposito A, Kumita JR, Nollen EAA, Dobson CM & Kaminski CF

- 776 (2011) A FRET sensor for non-invasive imaging of amyloid formation in vivo.  
777 *ChemPhysChem* **12**: 673–680
- 778 Kawamoto Y, Kobayashi Y, Suzuki Y, Inoue H, Tomimoto H, Akiguchi I, Budka H, Martins LM,  
779 Downward J & Takahashi R (2008) Accumulation of HtrA2/Omi in neuronal and glial  
780 inclusions in brains with  $\alpha$ -synucleinopathies. *J. Neuropathol. Exp. Neurol.* **67**: 984–993
- 781 Kordower JH & Brundin P (2009) Lewy body pathology in long-term fetal nigral transplants: Is  
782 Parkinson's disease transmitted from one neural system to another?  
783 *Neuropsychopharmacology* **34**: 254
- 784 Kotera I, Iwasaki T, Imamura H, Noji H & Nagai T (2010) Reversible Dimerization of Aequorea  
785 victoria Fluorescent Proteins Increases the Dynamic Range of FRET-Based Indicators.  
786 *ACS Chem. Biol.* **5**: 321–332
- 787 Langston J, Ballard P, Tetrud J & Irwin I (1983) Chronic Parkinsonism in humans due to a  
788 product of meperidine-analog synthesis. *Science (80-. )*. **219**: 979–980 Available at:  
789 <http://www.sciencemag.org/cgi/doi/10.1126/science.6823561>
- 790 Lautenschläger J, Lautenschläger C, Tadic V, S????e H, Ortmann W, Denzler J, Stallmach A,  
791 Witte OW & Grosskreutz J (2015) Novel computer vision algorithm for the reliable  
792 analysis of organelle morphology in whole cell 3D images - A pilot study for the  
793 quantitative evaluation of mitochondrial fragmentation in amyotrophic lateral sclerosis.  
794 *Mitochondrion* **25**: 49–59 Available at: <http://dx.doi.org/10.1016/j.mito.2015.10.003>
- 795 Lautenschläger J, Stephens AD, Fusco G, Ströhl F, Curry N, Zacharopoulou M, Michel CH,  
796 Laine R, Nespovitaya N, Fantham M, Pinotsi D, Zago W, Fraser P, Tandon A, St George-  
797 Hyslop P, Rees E, Phillips JJ, De Simone A, Kaminski CF & Schierle GSK (2018) C-terminal  
798 calcium binding of  $\alpha$ -synuclein modulates synaptic vesicle interaction. *Nat. Commun.* **9**:

- 799           712 Available at: <http://www.nature.com/articles/s41467-018-03111-4>
- 800   Lee BR & Kamitani T (2011) Improved immunodetection of endogenous  $\alpha$ -synuclein. *PLoS*  
801       *One* **6**:
- 802   Liu ML, Liu MJ, Kim JM, Kim HJ, Kim JH & Hong ST (2005) HtrA2 interacts with A beta peptide  
803       but does not directly alter its production or degradation. *Mol Cells* **20**: 83–89 Available  
804       at: <http://www.ncbi.nlm.nih.gov/pubmed/16258245>
- 805   Lu M, Williamson N, Mishra A, Michel CH, Kaminski CF, Tunnacliffe A & Kaminski Schierle GS  
806       (2019) Structural progression of amyloid- Arctic mutant aggregation in cells revealed by  
807       multiparametric imaging. *J. Biol. Chem.* **294**: 1478–1487
- 808   Lu X-H, Fleming SM, Meurers B, Ackerson LC, Mortazavi F, Lo V, Hernandez D, Sulzer D,  
809       Jackson GR, Maidment NT, Chesselet M-F & Yang XW (2009) Bacterial Artificial  
810       Chromosome Transgenic Mice Expressing a Truncated Mutant Parkin Exhibit Age-  
811       Dependent Hypokinetic Motor Deficits, Dopaminergic Neuron Degeneration, and  
812       Accumulation of Proteinase K-Resistant  $\alpha$ -Synuclein. *J. Neurosci.* **29**: 1962–1976  
813       Available at: <http://www.jneurosci.org/cgi/doi/10.1523/JNEUROSCI.5351-08.2009>
- 814   Ludtmann MHR, Angelova PR, Ninkina NN, Gandhi S, Buchman VL & Abramov AY (2016)  
815       Monomeric Alpha-Synuclein Exerts a Physiological Role on Brain ATP Synthase. *J.*  
816       *Neurosci.* **36**: 10510–10521 Available at:  
817       <http://www.ncbi.nlm.nih.gov/pubmed/27733604>  
818       **http://www.ncbi.nlm.nih.gov/pubmed/27733604**
- 819   Luk KC, Kehm VM, Zhang B, O'Brien P, Trojanowski JQ & Lee VMY (2012) Intracerebral  
820       inoculation of pathological  $\alpha$ -synuclein initiates a rapidly progressive  
821       neurodegenerative  $\alpha$ -synucleinopathy in mice. *J. Exp. Med.* **209**: 975–86 Available at:

- 822 <http://jem.rupress.org/content/209/5/975.long>
- 823 Luk KC, Song C, O'Brien P, Stieber A, Branch JR, Brunden KR, Trojanowski JQ & Lee VM-Y  
824 (2009) Exogenous alpha-synuclein fibrils seed the formation of Lewy body-like  
825 intracellular inclusions in cultured cells. *Proc. Natl. Acad. Sci. U. S. A.* **106**: 20051–6  
826 Available at: <http://www.pnas.org/content/106/47/20051.full>
- 827 Di Maio R, Barrett PJ, Hoffman EK, Barrett CW, Zharikov A, Borah A, Hu X, McCoy J, Chu CT,  
828 Burton EA, Hastings TG & Greenamyre JT (2016)  $\alpha$ -synuclein binds to TOM20 and  
829 inhibits mitochondrial protein import in Parkinson's disease. *Sci. Transl. Med.* **8**: 1–14
- 830 Marchenko S & Flanagan L (2007) Immunocytochemistry: human neural stem cells. *J. Vis.*  
831 *Exp.*: 267
- 832 Martínez JH, Fuentes F, Vanasco V, Alvarez S, Cassina A, Leskow FC & Velazquez F (2018)  
833 Mitochondrial interaction of alpha-synuclein leads to irreversible translocation and  
834 complex I impairment. *Arch. Biochem. Biophys.* **651**: 1–12 Available at:  
835 <https://doi.org/10.1016/j.abb.2018.04.018>
- 836 Martins LM, Morrison A, Klupsch K, Fedele V, Moiso N, Teismann P, Abuin A, Grau E,  
837 Geppert M, George P, Creasy CL, Martin A, Hargreaves I, Heales SJ, Okada H, Brandner  
838 S, Schulz B, Mak T, Downward J & Livi GP (2004) Neuroprotective Role of the Reaper-  
839 Related Serine Protease HtrA2 / Omi Revealed by Targeted Deletion in Mice. *Mol. Cell.*  
840 *Biol.* **24**: 9848–9862
- 841 Mellgren L (1987) Calcium-dependent proteases: an enzyme system active at cellular  
842 membranes? *FASEB J* **1**: 110–5
- 843 Mossmann D, Vögtle FN, Taskin AA, Teixeira PF, Ring J, Burkhart JM, Burger N, Pinho CM,  
844 Tadic J, Loreth D, Graff C, Metzger F, Sickmann A, Kretz O, Wiedemann N, Zahedi RP,

- 845 Madeo F, Glaser E & Meisinger C (2014) Amyloid- $\beta$  peptide induces mitochondrial  
846 dysfunction by inhibition of preprotein maturation. *Cell Metab.* **20**: 662–669
- 847 Müller M, Mönkemöller V, Hennig S, Hübner W & Huser T (2016) Open-source image  
848 reconstruction of super-resolution structured illumination microscopy data in ImageJ.  
849 *Nat. Commun.* **7**: 1–6
- 850 Nath S, Goodwin J, Engelborghs Y & Pountney DL (2011) Raised calcium promotes  $\alpha$ -  
851 synuclein aggregate formation. *Mol. Cell. Neurosci.* **46**: 516–526 Available at:  
852 <http://linkinghub.elsevier.com/retrieve/pii/S1044743110002678>
- 853 Park HJ, Seong YM, Choi JY, Kang S & Rhim H (2004) Alzheimer's disease-associated amyloid  
854 beta interacts with the human serine protease HtrA2/Omi. *Neurosci. Lett.* **357**: 63–67
- 855 Peelaerts W, Bousset L, Van Der Perren A, Moskalyuk A, Pulizzi R, Giugliano M, Van Den  
856 Haute C, Melki R & Baekelandt V (2015)  $\alpha$ -Synuclein strains cause distinct  
857 synucleinopathies after local and systemic administration. *Nature* **522**: 340–344
- 858 Pinotsi D, Michel CH, Buell AK, Laine RF, Mahou P, Dobson CM, Kaminski CF & Kaminski GS  
859 (2016) Nanoscopic insights into seeding mechanisms and toxicity of  $\alpha$ -synuclein species  
860 in neurons. *PNAS* **113**: 3815–3819
- 861 Plun-Favreau H, Klupsch K, Moiso N, Gandhi S, Kjaer S, Frith D, Harvey K, Deas E, Harvey RJ,  
862 McDonald N, Wood NW, Martins LM & Downward J (2007) The mitochondrial protease  
863 HtrA2 is regulated by Parkinson's disease-associated kinase PINK1. *Nat. Cell Biol.* **9**:  
864 1243–1252 Available at: <http://www.nature.com/doifinder/10.1038/ncb1644>
- 865 Quirós PM, Langer T & López-Otín C (2015) New roles for mitochondrial proteases in health,  
866 ageing and disease. *Nat. Rev. Mol. Cell Biol.* **16**: 345–359 Available at:  
867 <http://www.nature.com/doifinder/10.1038/nrm3984>

- 868 Ray P, Chakrabarti AK, Broomfield CA & Ray R (2002) Sulfur mustard-stimulated protease: A  
869 target for antivesicant drugs. *J. Appl. Toxicol.* **22**: 139–140
- 870 Reeve a K, Ludtmann MH, Angelova PR, Simcox EM, Horrocks MH, Klenerman D, Gandhi S,  
871 Turnbull DM & Abramov a Y (2015) Aggregated  $\alpha$ -synuclein and complex I deficiency:  
872 exploration of their relationship in differentiated neurons. *Cell Death Dis.* **6**: e1820  
873 Available at: <http://www.ncbi.nlm.nih.gov/pubmed/26181201>
- 874 Robotta M, Gerding HR, Vogel A, Hauser K, Schildknecht S, Karreman C, Leist M,  
875 Subramaniam V & Drescher M (2014) Alpha-synuclein binds to the inner membrane of  
876 mitochondria in an a-helical conformation. *ChemBioChem* **15**: 2499–2502
- 877 Ruan L, Zhou C, Jin E, Kucharavy A, Zhang Y, Wen Z, Florens L & Li R (2017) Cytosolic  
878 proteostasis through importing of misfolded proteins into mitochondria. *Nature* **543**:  
879 443–446 Available at: <http://www.nature.com/doi/10.1038/nature21695>
- 880 Rui Y & Zheng JQ (2016) Amyloid  $\beta$  oligomers elicit mitochondrial transport defects and  
881 fragmentation in a time-dependent and pathway-specific manner. *Mol. Brain* **9**: 79  
882 Available at:  
883 <http://www.ncbi.nlm.nih.gov/pubmed/27535553>  
884 <http://www.pubmedcentral.nih.gov/articlerender.fcgi?artid=PMC4989350>
- 885 Ryan T, Bamm V V., Stykel MG, Coackley CL, Humphries KM, Jamieson-Williams R,  
886 Ambasadhan R, Mosser DD, Lipton SA, Harauz G & Ryan SD (2018) Cardiolipin exposure  
887 on the outer mitochondrial membrane modulates  $\alpha$ -synuclein. *Nat. Commun.* **9**: 1–17  
888 Available at: <http://dx.doi.org/10.1038/s41467-018-03241-9>
- 889 Sancak Y, Peterson TR, Shaul YD, Lindquist RA, Thoreen CC, Bar-Peled L & Sabatini DM (2008)  
890 The rag GTPases bind raptor and mediate amino acid signaling to mTORC1. *Science* (80-

- 891 ). **320**: 1496–1501
- 892 Schierle GSK, Sauer M & Kaminski CF (2014) Probing Amyloid Aggregation and Morphology  
893 In Situ by Multiparameter Imaging and Super-Resolution Fluorescence Microscopy. *Bio-*  
894 *nanoimaging*: 105–120
- 895 Schindelin J, Arganda-Carreras I, Frise E, Kaynig V, Longair M, Pietzsch T, Preibisch S, Rueden  
896 C, Saalfeld S, Schmid B, Tinevez J-Y, White DJ, Hartenstein V, Eliceiri K, Tomancak P &  
897 Cardona A (2012) Fiji: an open-source platform for biological-image analysis. *Nat.*  
898 *Methods* **9**: 676–682 Available at:  
899 <http://www.nature.com/doi/10.1038/nmeth.2019>
- 900 Sherer TB, Kim J-H, Betarbet R & Greenamyre JT (2003) Subcutaneous Rotenone Exposure  
901 Causes Highly Selective Dopaminergic Degeneration and  $\alpha$ -Synuclein Aggregation. *Exp.*  
902 *Neurol.* **179**: 9–16 Available at:  
903 [http://www.sciencedirect.com/science/article/pii/S0014488602980726%5Chttp://ww](http://www.sciencedirect.com/science/article/pii/S0014488602980726%5Chttp://www.sciencedirect.com/science/article/pii/S0014488602980726/pdf?md5=2eab2f018db2b1d971489608006acdc&pid=1-s2.0-S0014488602980726-main.pdf)  
904 [w.sciencedirect.com/science/article/pii/S0014488602980726/pdf?md5=2eab2f018db2](http://www.sciencedirect.com/science/article/pii/S0014488602980726/pdf?md5=2eab2f018db2b1d971489608006acdc&pid=1-s2.0-S0014488602980726-main.pdf)  
905 [b1d971489608006acdc&pid=1-s2.0-S0014488602980726-main.pdf](http://www.sciencedirect.com/science/article/pii/S0014488602980726/pdf?md5=2eab2f018db2b1d971489608006acdc&pid=1-s2.0-S0014488602980726-main.pdf)
- 906 Sorrentino V, Romani M, Mouchiroud L, Beck JS, Zhang H, D'Amico D, Moullan N, Potenza F,  
907 Schmid AW, Rietsch S, Counts SE & Auwerx J (2017) Enhancing mitochondrial  
908 proteostasis reduces amyloid- $\beta$  proteotoxicity. *Nature* **552**: 187–193 Available at:  
909 <http://www.nature.com/doi/10.1038/nature25143>
- 910 Stopschinski BE & Diamond MI (2017) The prion model for progression and diversity of  
911 neurodegenerative diseases. *Lancet Neurol.* **16**: 323–332 Available at:  
912 [http://dx.doi.org/10.1016/S1474-4422\(17\)30037-6](http://dx.doi.org/10.1016/S1474-4422(17)30037-6)
- 913 Strauss KM, Martins LM, Plun-Favreau H, Marx FP, Kautzmann S, Berg D, Gasser T, Wszolek

- 914 Z, Müller T, Bornemann A, Wolburg H, Downward J, Riess O, Schulz JB & Krüger R (2005)  
915 Loss of function mutations in the gene encoding Omi/HtrA2 in Parkinson's disease.  
916 *Hum. Mol. Genet.* **14**: 2099–2111
- 917 Subramaniam SR, Vergnes L, Franich NR, Reue K & Chesselet MF (2014) Region specific  
918 mitochondrial impairment in mice with widespread overexpression of alpha-synuclein.  
919 *Neurobiol. Dis.* **70**: 204–213 Available at: <http://dx.doi.org/10.1016/j.nbd.2014.06.017>
- 920 Sum TH, Sum TJ, Galloway WRJD, Collins S, Twigg DG, Hollfelder F & Spring DR (2016)  
921 Combinatorial synthesis of structurally diverse triazole-bridged flavonoid dimers and  
922 trimers. *Molecules* **21**:
- 923 Thakur P, Breger LS, Lundblad M, Wan OW, Mattsson B, Luk KC, Lee VMY, Trojanowski JQ &  
924 Björklund A (2017) Modeling Parkinson's disease pathology by combination of fibril  
925 seeds and  $\alpha$ -synuclein overexpression in the rat brain. *Proc. Natl. Acad. Sci.*: 201710442  
926 Available at: <http://www.pnas.org/lookup/doi/10.1073/pnas.1710442114>
- 927 Unal Gulsuner H, Gulsuner S, Mercan FN, Onat OE, Walsh T, Shahin H, Lee MK, Dogu O,  
928 Kansu T, Topaloglu H, Elibol B, Akbostanci C, King M-C, Ozcelik T & Tekinay AB (2014)  
929 Mitochondrial serine protease HTRA2 p.G399S in a kindred with essential tremor and  
930 Parkinson disease. *Proc. Natl. Acad. Sci.* **111**: 18285–18290 Available at:  
931 <http://www.pnas.org/lookup/doi/10.1073/pnas.1419581111>
- 932 Vaux DL & Silke J (2003) HtrA2/Omi, a sheep in Wolf's clothing. *Cell* **115**: 251–253
- 933 Wang LF, Christensen BN, Bhatnagar A & Srivastava SK (2001) Role of calcium-dependent  
934 protease(s) in globulization of isolated rat lens cortical fiber cells. *Investig. Ophthalmol.*  
935 *Vis. Sci.* **42**: 194–199
- 936 Warren SC, Margineanu A, Alibhai D, Kelly DJ, Talbot C, Alexandrov Y, Munro I, Katan M,



- 937 Dunsby C & French PMW (2013) Rapid Global Fitting of Large Fluorescence Lifetime  
938 Imaging Microscopy Datasets. *PLoS One* **8**:
- 939 Westerlund M, Behbahani H, Gellhaar S, Forsell C, Belin AC, Anvret A, Zettergren A,  
940 Nissbrandt H, Lind C, Sydow O, Graff C, Olson L, Ankarcrona M & Galter D (2011)  
941 Altered enzymatic activity and allele frequency of OMI/HTRA2 in Alzheimer's disease.  
942 *FASEB J.* **25**: 1345–52 Available at: [http://www.fasebj.org/cgi/doi/10.1096/fj.10-](http://www.fasebj.org/cgi/doi/10.1096/fj.10-163402)  
943 [163402](http://www.ncbi.nlm.nih.gov/pubmed/21163861)[5Cnhttp://www.ncbi.nlm.nih.gov/pubmed/21163861](http://www.ncbi.nlm.nih.gov/pubmed/21163861)<http://www.pubme>  
944 [dcentral.nih.gov/articlerender.fcgi?artid=PMC3228343](http://www.ncbi.nlm.nih.gov/pubmed/21163861)[5Cnhttp://www.pubmedcentra](http://www.ncbi.nlm.nih.gov/pubmed/21163861)  
945 [l.nih.gov/articlerender.fcgi?artid=3228343&tool=pmcentrez&r](http://www.ncbi.nlm.nih.gov/articlerender.fcgi?artid=3228343&tool=pmcentrez&r)
- 946 Wu H, Zhang F, Williamson N, Jian J, Zhang L, Liang Z, Wang J, An L, Tunnacliffe A & Zheng Y  
947 (2014) Effects of secondary metabolite extract from *Phomopsis occulta* on  $\beta$ -amyloid  
948 aggregation. *PLoS One* **9**:
- 949 Young LJ, Ströhl F & Kaminski CF (2016) A Guide to Structured Illumination TIRF Microscopy  
950 at High Speed with Multiple Colors. *J. Vis. Exp.*: 1–16 Available at:  
951 [http://www.jove.com/video/53988/a-guide-to-structured-illumination-tirf-microscopy-](http://www.jove.com/video/53988/a-guide-to-structured-illumination-tirf-microscopy-at-high-speed-with)  
952 [at-high-speed-with](http://www.jove.com/video/53988/a-guide-to-structured-illumination-tirf-microscopy-at-high-speed-with)
- 953  
954  
955  
956  
957  
958  
959

960 **Figure Legends**

961

962 **Fig. 1. The preformed fibril (PFF) model mimics alpha-synuclein seeding in disease.**

963 (A) Schematic overview of the PFF assay.

964 (B) Structured illumination microscopy (SIM) images of SH-SY5Y cells overexpressing YFP-  
965 tagged alpha-synuclein without alpha-synuclein fibrillization (left) and upon PFF-induced  
966 seeding (right). Scale bars: 10  $\mu$ m.

967 (C and D) Co-staining of YFP-alpha-synuclein fibrils with ubiquitin and ubiquitin-binding  
968 protein p62. Scale bars: 10  $\mu$ m.

969

970 **Fig. 2. Mitochondrial dysfunction increases alpha-synuclein seeding.**

971 (A) YFP-alpha-synuclein SH-SY5Y cells treated with DMSO (control), 10  $\mu$ M BAPTA-AM before  
972 (1h) or before and during the incubation with PFFs (5h). Scale bars: 20  $\mu$ m. Alpha-synuclein  
973 seeding was increased upon 1h pre-treatment and 5h treatment with BAPTA-AM. Data are  
974 presented as mean  $\pm$  SEM. \* $p$  = 0.0127 and \*\*\*\* $p$  < 0.0001 (Kruskal-Wallis test with Dunn's  
975 multiple comparison). N = 16, 9, 15 with n = regions analyzed, three biological repeats.

976 (B) FLIM measurements of cytosolic calcium in SH-SY5Y cells treated with DMSO (control) or  
977 10  $\mu$ M BAPTA-AM for 10 min, 1h or 5h. The cytosolic calcium level was significantly reduced  
978 upon 10 min incubation with BAPTA-AM, however after 1h calcium returned to basal levels,  
979 reaching significantly increased concentrations after 5h treatment. Data are presented as  
980 mean  $\pm$  SEM. \*\*\*\* $p$  < 0.0001 (Kruskal-Wallis test with Dunn's multiple comparison). N = 88,  
981 54, 61, 46, with n = cells analyzed, three biological repeats.

982 (C) ThT assay of in vitro alpha-synuclein aggregation in the presence of DMSO, 10  $\mu$ M BAPTA-  
983 AM, or 10  $\mu$ M BAPTA. Data from three biological repeats.

984 (D) SIM images of mitochondrial network stained with Mito-RFP in SH-SH5Y cells treated with  
985 DMSO (control) or 10  $\mu$ M BAPTA-AM. Scale bars: 5  $\mu$ m.

986 (E) YFP-alpha-synuclein SH-SY5Y cells treated with DMSO (control), 10  $\mu$ M FCCP before (1h) or  
987 before and during the incubation with PFFs (5h). Scale bars: 20  $\mu$ m. Alpha-synuclein seeding  
988 was increased upon 5h treatment with FCCP. Data are presented as mean  $\pm$  SEM. \*\*p = 0.0064  
989 (Kruskal-Wallis test with Dunn's multiple comparison). N = 16, 6, 9 with n = regions analyzed,  
990 three biological repeats.

991 (F) ThT assay of in vitro alpha-synuclein aggregation in the presence of DMSO or 10  $\mu$ M FCCP.  
992 Data from three biological repeats.

993

994 **Fig. 3. Downstream effectors of mitochondrial dysfunction do not influence alpha-synuclein**  
995 **seeding.**

996 (A) YFP-alpha-synuclein SH-SY5Y cells treated with DMSO (control), 500  $\mu$ M MPP<sup>+</sup>, 1  $\mu$ M  
997 ionomycin, or 3  $\mu$ M menadione for 3 days (1h before, during PFF incubation, and during  
998 seeding). Scale bars: 20  $\mu$ m. Alpha-synuclein seeding was not significantly increased (one-way  
999 ANOVA with Dunnett's post-hoc correction). Data are presented as mean  $\pm$  SEM, N = 11, 8, 8,  
1000 7 with n = regions analyzed, three biological repeats.

1001 (B) FLIM measurements of ATP levels, cytosolic calcium, and H<sub>2</sub>O<sub>2</sub> in SH-SY5Y cells treated with  
1002 DMSO (control), the respective positive control, 10  $\mu$ M FCCP and 10  $\mu$ M BAPTA-AM for 1 h.  
1003 Scale bars: 20  $\mu$ m.

1004 (C) The effect of 500  $\mu$ M MPP<sup>+</sup> on ATP levels was lower than with FCCP, but higher than the  
1005 effect of BAPTA-AM. The effect of 1  $\mu$ M ionomycin on cytosolic calcium levels was higher than  
1006 with FCCP and BAPTA-AM. The effect of 3  $\mu$ M menadione on cytosolic H<sub>2</sub>O<sub>2</sub> levels was  
1007 comparable with the effect of FCCP and BAPTA-AM. Data are presented as mean  $\pm$  SEM. \*\*\*\*p

1008 < 0.0001 and N = 43, 74, 48, 47 for ATP levels. \*\*\*\*p < 0.0001 and N = 88, 60, 42, 61 for  
1009 cytosolic calcium levels. \*\*p = 0.0017, p = 0.0012 and p = 0.0058 and N = 79, 63, 36, 70 for  
1010 cytosolic H<sub>2</sub>O<sub>2</sub> levels (Kruskal-Wallis test with Dunn's multiple comparison), with n = cells  
1011 analyzed, three biological repeats.

1012 (D and E) Quantification of mitochondrial fragmentation for 5h treatments, showing  
1013 significant reduced mitochondrial length upon treatment with FCCP and BAPTA-AM. Data are  
1014 presented as mean ± SEM. \*\*\*\*p < 0.0001 (Kruskal-Wallis test with Dunn's multiple  
1015 comparison). N = 76, 92, 103, 90, 88, 89 with n = individual images, three biological repeats.  
1016 Images analysis for mitochondria fragmentation using NIEL Mito (Lautenschläger *et al*, 2015),  
1017 scale bars: 10 μm.

1018

1019 **Fig. 4. Inhibition of mitochondrial proteases and mitochondrial protein import increase**  
1020 **alpha-synuclein seeding.**

1021 (A) YFP-alpha-synuclein SH-SY5Y cells treated with DMSO (control), 1 μM CDDO-Me, or 20 μM  
1022 UCF-101 before and during the incubation with PFFs (5h). Scale bars: 20 μm. Alpha-synuclein  
1023 seeding was increased upon both treatments. Data are presented as mean ± SEM. \*\*p = 0.005  
1024 and \*\*\*\*p < 0.0001 (Kruskal-Wallis test with Dunn's multiple comparison). N = 15, 9, 11 with  
1025 n = regions analyzed, three biological repeats.

1026 (B) Western blot of mitochondria isolated from adult rat brain, native, proteinase K (PK) or PK  
1027 in the presence of 0.1% TritonX-100.

1028 (C) Relative intensity of bands normalized to native mitochondria. Data are presented as mean  
1029 ± SEM. \*\*\*p = 0.0007, \*\*\*\*p = < 0.0001, \*\*p = 0.0017 (one-way ANOVA with Tukey's post-  
1030 hoc correction). N = 3 for all conditions with n = biological repeats.

1031

1032 (D) Transmission electron microscopy (TEM) of YFP alpha-synuclein SH-SY5Y cells showing that  
1033 alpha-synuclein is contained within mitochondria. Arrows indicate individual immunogold  
1034 labelling within mitochondria. m = mitochondria, cyt = cytoplasm. Scale bar: 100 nm.

1035 (E) YFP-alpha-synuclein SH-SY5Y cells treated with DMSO (control), or 50  $\mu$ M MitobloCK-6  
1036 before and during the incubation with PFFs (5h). Scale bars: 20  $\mu$ m. Alpha-synuclein seeding  
1037 was significantly increased upon treatment. Data are presented as mean  $\pm$  SEM. \*\*\*\*p <  
1038 0.0001 (two-tailed Mann-Whitney U test). N = 15, 11 with n = regions analyzed, three  
1039 biological repeats.

1040

1041 **Fig. 5. Mitochondrial proteostasis influences  $\beta$ -amyloid 42 aggregation.**

1042 (A) A $\beta$ 42-mCherry cells treated with DMSO (control), 1  $\mu$ M FCCP or 10  $\mu$ M BAPTA-AM for 24  
1043 h. The aggregation of A $\beta$ 42 was increased upon treatment with FCCP and BAPTA-AM. Data are  
1044 presented as mean  $\pm$  SEM. \*p = 0.0298 and \*\*\*\*p < 0.0001 (Kruskal-Wallis test with Dunn's  
1045 multiple comparison). N = 9, for all conditions, with n = wells analyzed, three biological  
1046 repeats.

1047 (B) A $\beta$ 42-mCherry cells treated with DMSO (control), 0.1  $\mu$ M CDDO-Me or 20  $\mu$ M UCF-101 for  
1048 24 h. The aggregation of A $\beta$ 42 was increased upon treatment with UCF-101. Data are  
1049 presented as mean  $\pm$  SEM. \*\*\*p = 0.0001 (one-way ANOVA with Dunnett's post-hoc  
1050 correction). N = 9, for all conditions, with n = wells analyzed, three biological repeats.

1051 (C) A $\beta$ 42-mCherry cells treated with DMSO (control) or 5  $\mu$ M MitobloCK-6 for 24 h. The  
1052 aggregation of A $\beta$ 42 was increased upon treatment with MitobloCK-6. Data are presented as  
1053 mean  $\pm$  SEM. \*\*p = 0.0088 (two-tailed unpaired t-test). N = 9, for all conditions, with n = wells  
1054 analyzed, three biological repeats.

1055 (D) A $\beta$ 42-mCherry cells were transfected with either uncut pcDNA3 (control) or HtrA2 pcDNA3  
1056 and A $\beta$ 42-mCherry expression was induced with tetracycline for 3 days. The aggregation of  
1057 A $\beta$ 42 was decreased upon overexpression of HtrA2. Data are presented as mean  $\pm$  SEM. \*\*p  
1058 = 0.0089 (two-tailed unpaired t-test). N = 9, 9 with n = regions analyzed, three biological  
1059 repeats.  
1060 Scale bars: 20  $\mu$ m.

1061

1062 **Fig. 6. HtrA2 influences in-vitro aggregation of  $\beta$ -amyloid 42.**

1063 (A) FLIM measurements for the aggregation of A $\beta$ 42 at the beginning of the experiment (time  
1064 0) and after 2 hours of incubation at room temperature (time 2 hrs), showing a decrease in  
1065 lifetime in control conditions demonstrating aggregation of the protein. No decrease in  
1066 lifetime, i.e. aggregation was evident upon addition of isolated mitochondria. Data are  
1067 presented as mean  $\pm$  SEM. \*\*p =0.0025 and \*\*\*\*p< 0.0001 (one-way ANOVA with Tukey's  
1068 post-hoc correction). N = 7, 8, 7, 7 with n = wells analyzed, three biological repeats. Scale bars:  
1069 20  $\mu$ m.

1070 (B) FLIM measurements for the aggregation of A $\beta$ 42 at the beginning of the experiment (time  
1071 0) and after 2 hours of incubation at room temperature (time 2 hrs), showing a decrease in  
1072 lifetime when UCF-101 treated mitochondria were added. Data are presented as mean  $\pm$  SEM.  
1073 \*\*\*p =0.0009 and \*p= 0.0142 (one-way ANOVA with Tukey's post-hoc correction). N = 8, 8, 7,  
1074 8 with n = wells analyzed, three biological repeats. Scale bars: 20  $\mu$ m.

1075

1076

1077

1078

1079 **FigEV. 1. AFM of preformed alpha-synuclein fibrils**

1080  
1081 Preformed fibrils generated from recombinant human wild-type alpha-synuclein shown by  
1082 atomic force microscopy before (upper panel) and after sonication (lower panel). Scale bars:  
1083 1  $\mu\text{m}$ .

1084

1085 **FigEV. 2. Example images of immunogold TEM, supplementary to Fig. 4D**

1086  
1087 (A) Representative images of transmission electron microscopy (TEM) from SH-SY5Y cells  
1088 overexpressing YFP-alpha-synuclein showing that alpha-synuclein is contained within  
1089 mitochondria. Arrows indicate individual immunogold labelling within mitochondria. Scale  
1090 bars: 500 nm.

1091 (B) TEM images and quantification of anti-GFP staining in control SH-SY5Y cells and SH-SY5Y  
1092 cells overexpressing YFP-alpha-synuclein. Data are presented as mean  $\pm$  SEM. \*\*\* $p = 0.0002$   
1093 (two-tailed unpaired t-test).  $N = 10, 13$  with  $n =$  images analyzed. Scale bars: 500 nm.

1094

1095

1096

1097

1098

1099

1100

1101

1102

1103

1104

1105 **Figures**

1106

1107 **Figure 1**

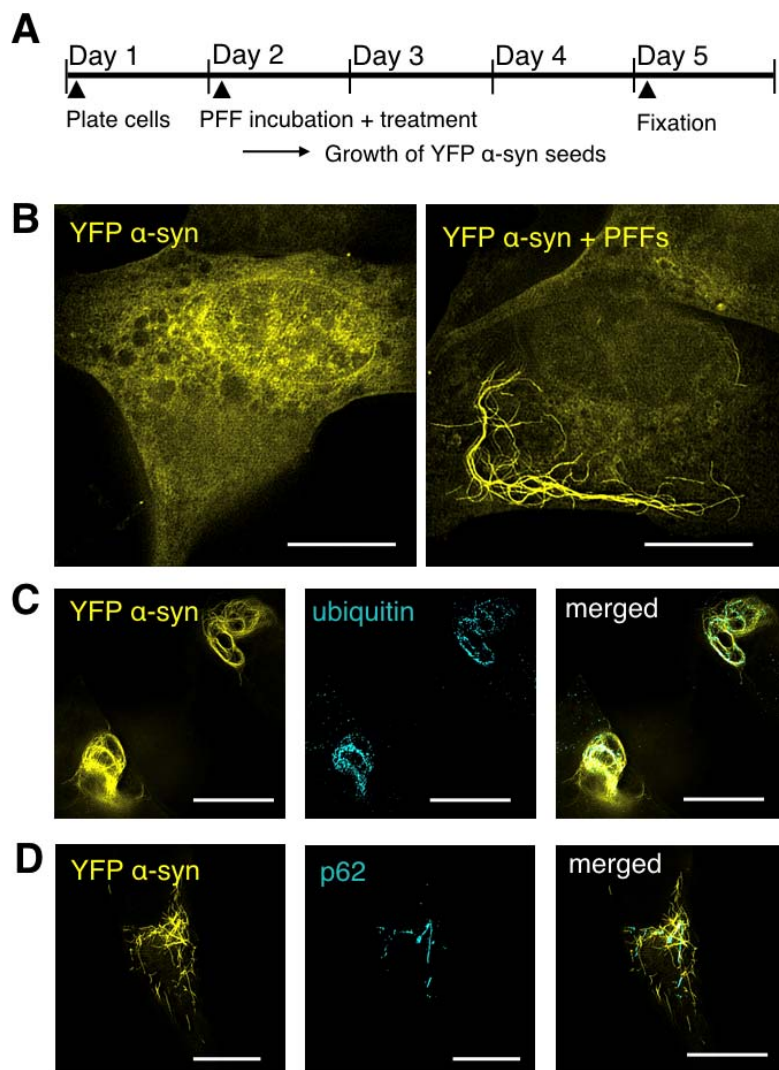

1108

1109

1110

1111

1112

1113

1114



1115 **Figure 2**

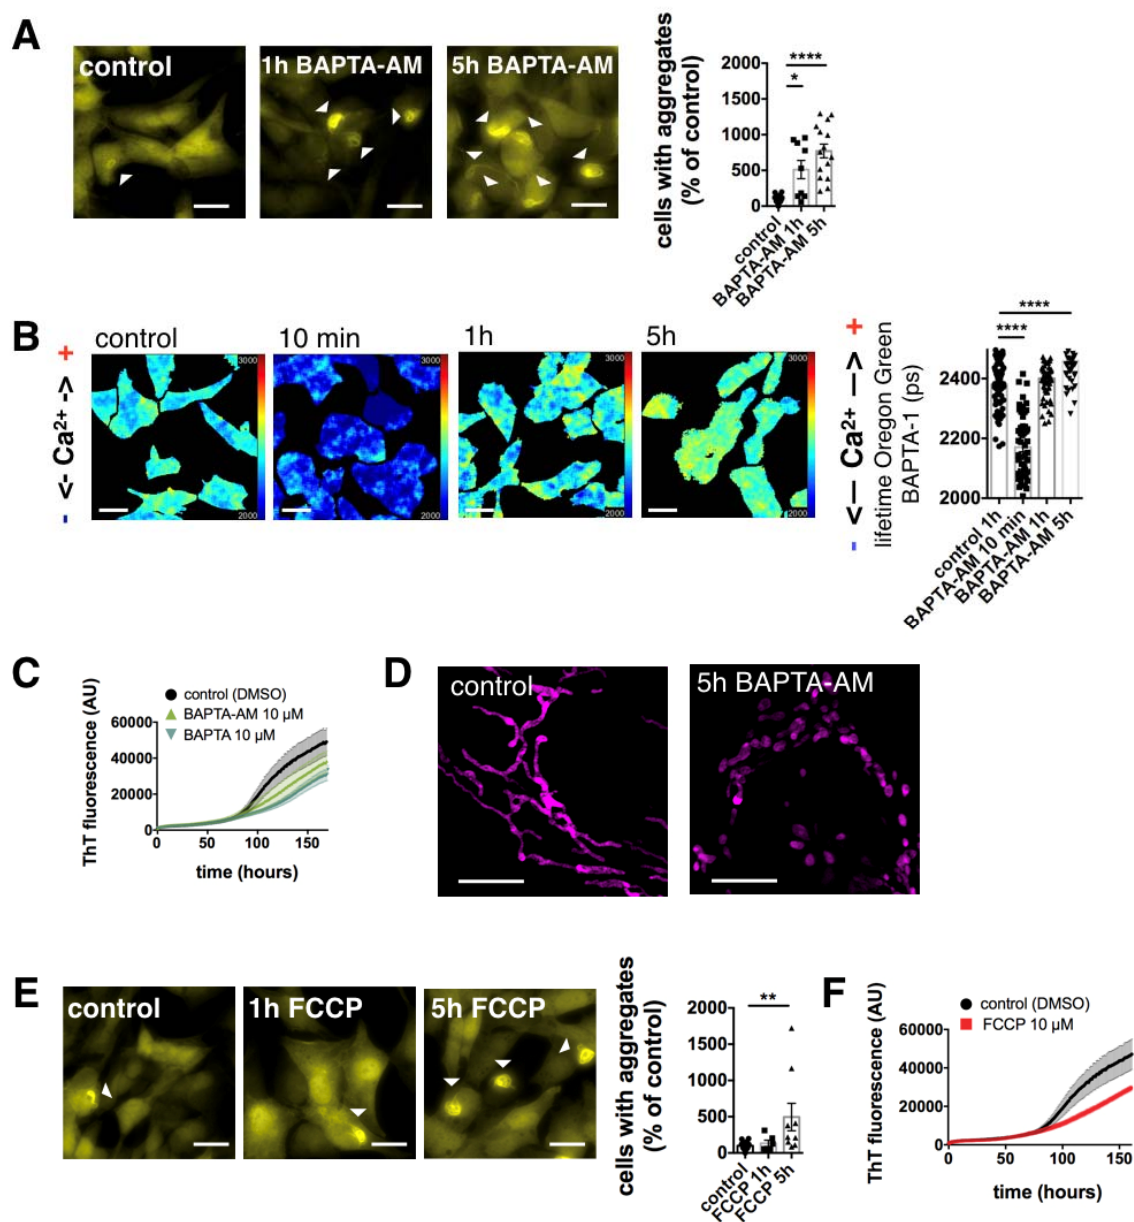

1116

1117

1118

1119

1120

1121

1122

1123 **Figure 3**

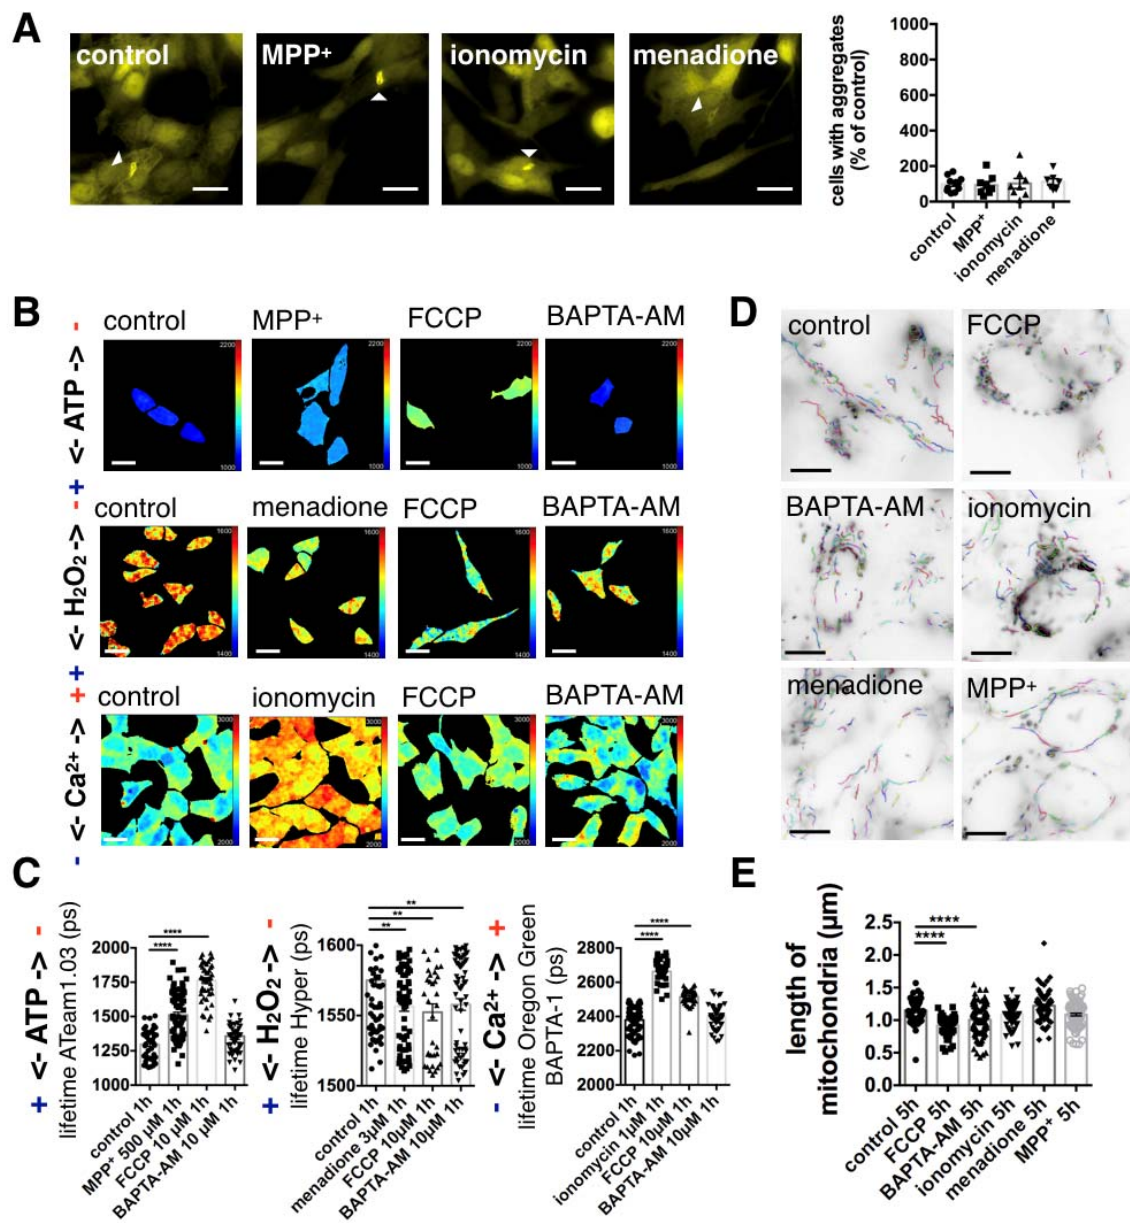

1124

1125

1126

1127

1128

1129

1130

1131 **Figure 4**

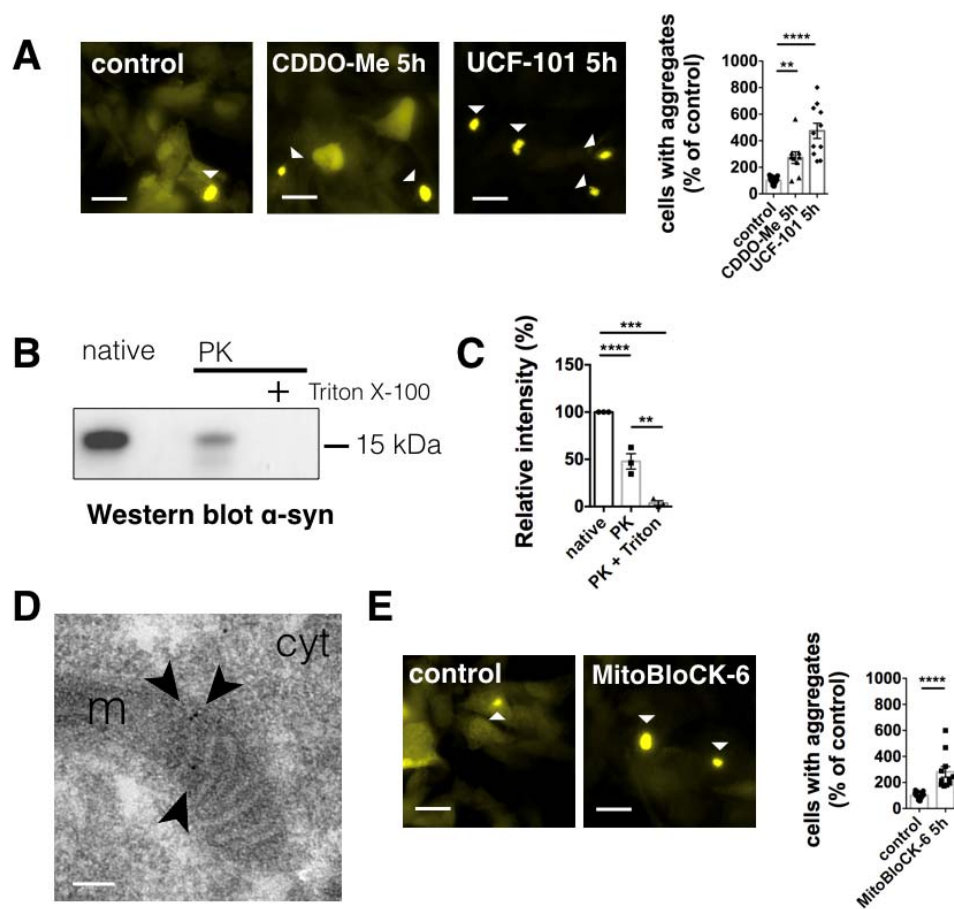

1132

1133

1134

1135

1136

1137

1138

1139

1140

1141

1142

1143 **Figure 5**

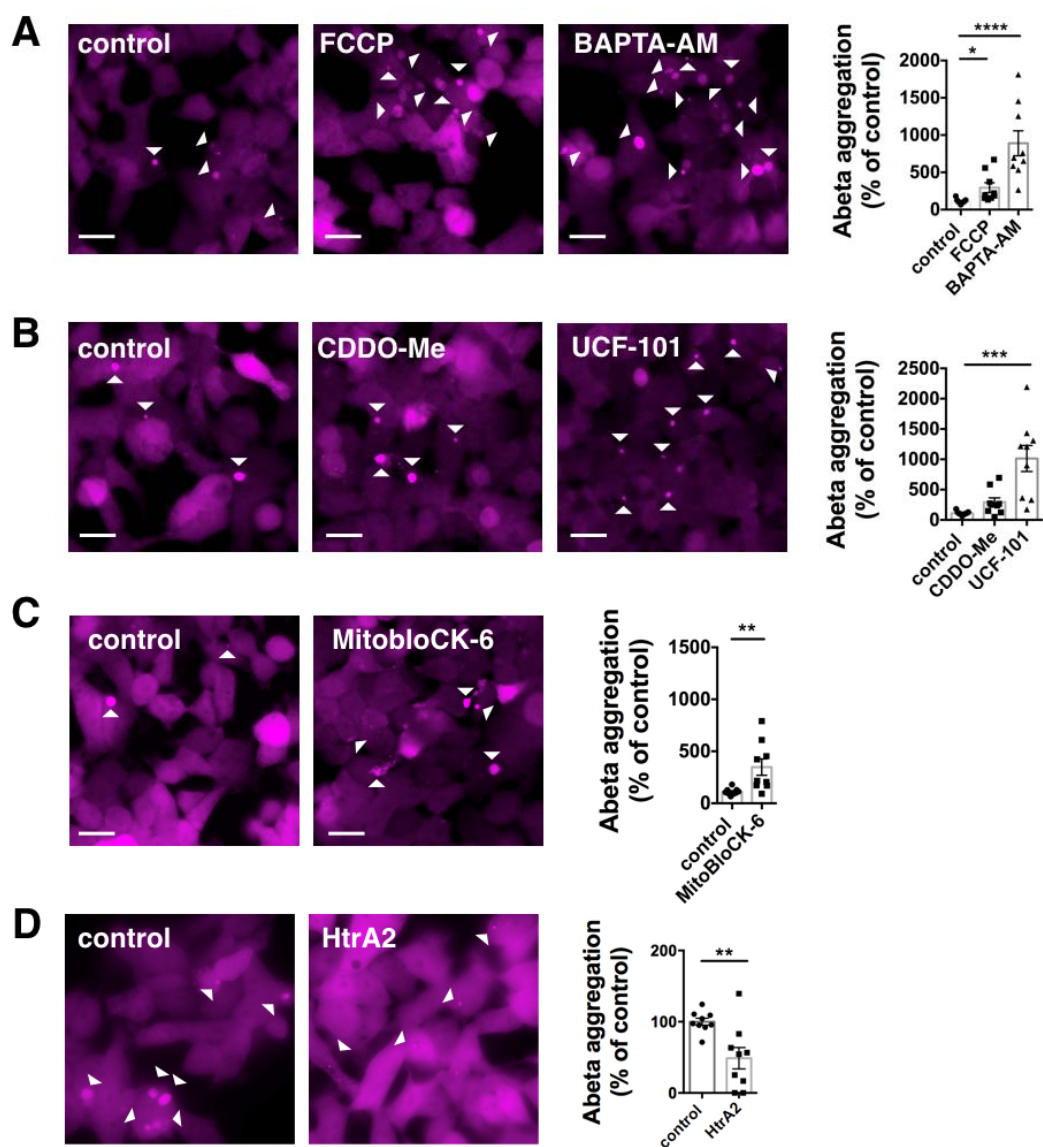

1144

1145

1146

1147

1148

1149

1150

1151

1152 **Figure 6**

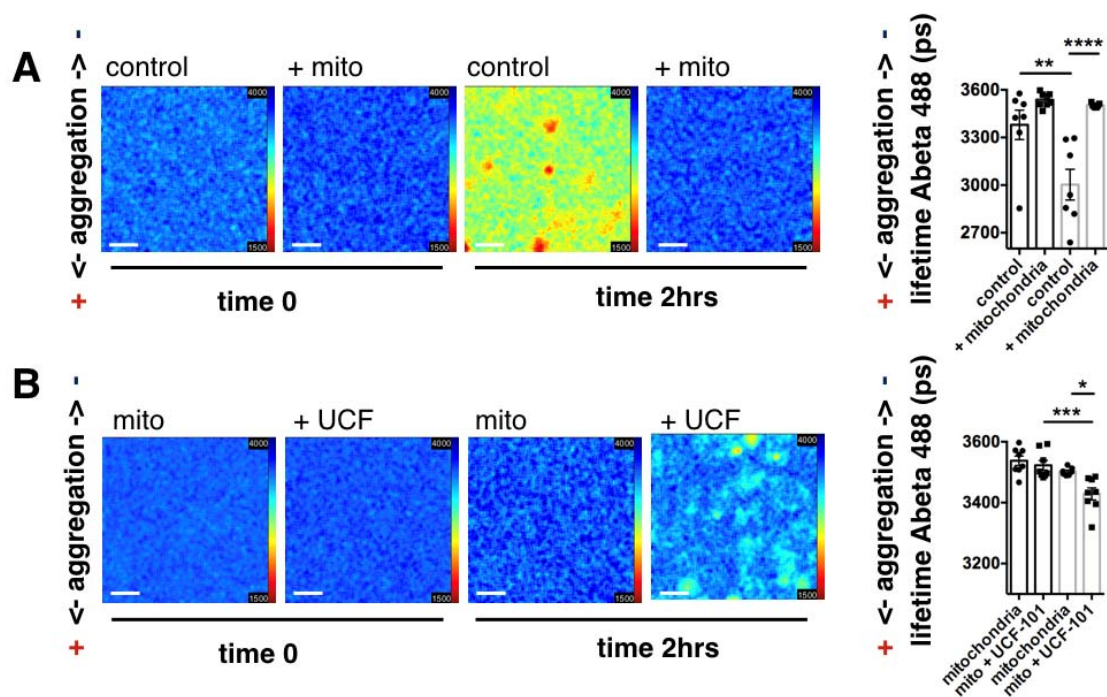

1153

1154

1155

1156

1157

1158

1159

1160

1161

1162

1163

1164

1165

1166 **Figure EV 1**

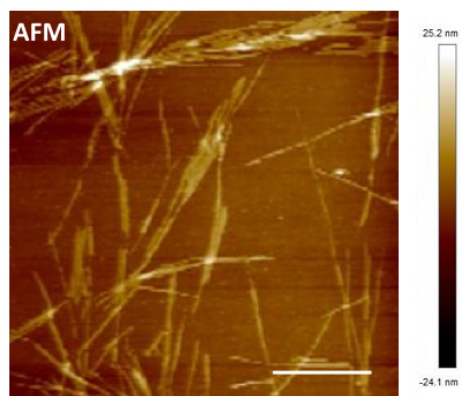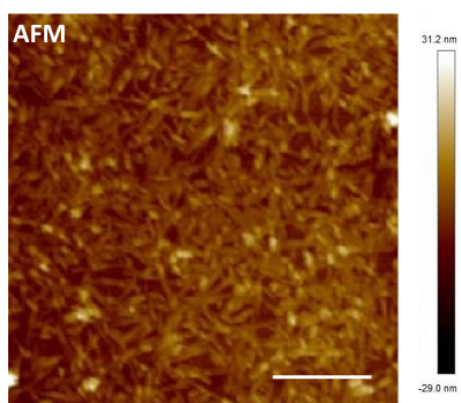

1167

1168

1169

1170

1171

1172

1173

1174

1175

1176

1177

1178

1179 **Figure EV 2**

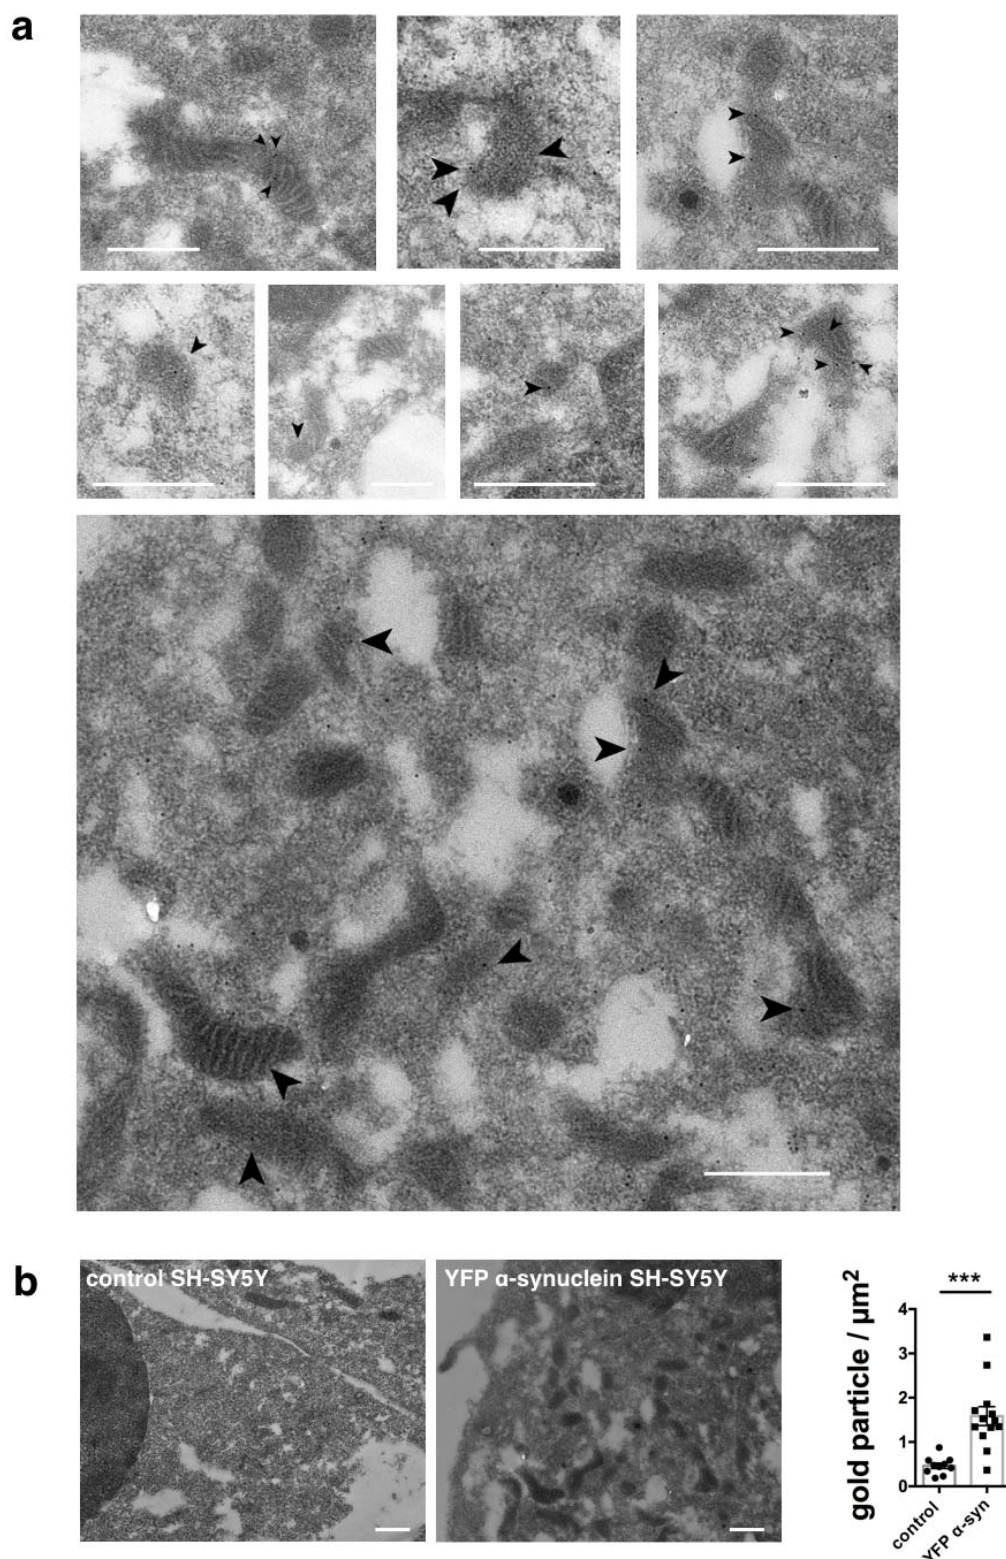

1180
